# Supplementary material for: Structural basis of circularly permuted group II intron self-splicing
Source: Research Square preprint supplement (doi:10.21203/rs.3.rs-3888028/v1), 2024-10-01
Supplement: Supplementary file 1 [file 8bb8d8e7b042c5ed70ecd7e1.docx]

Extended Data


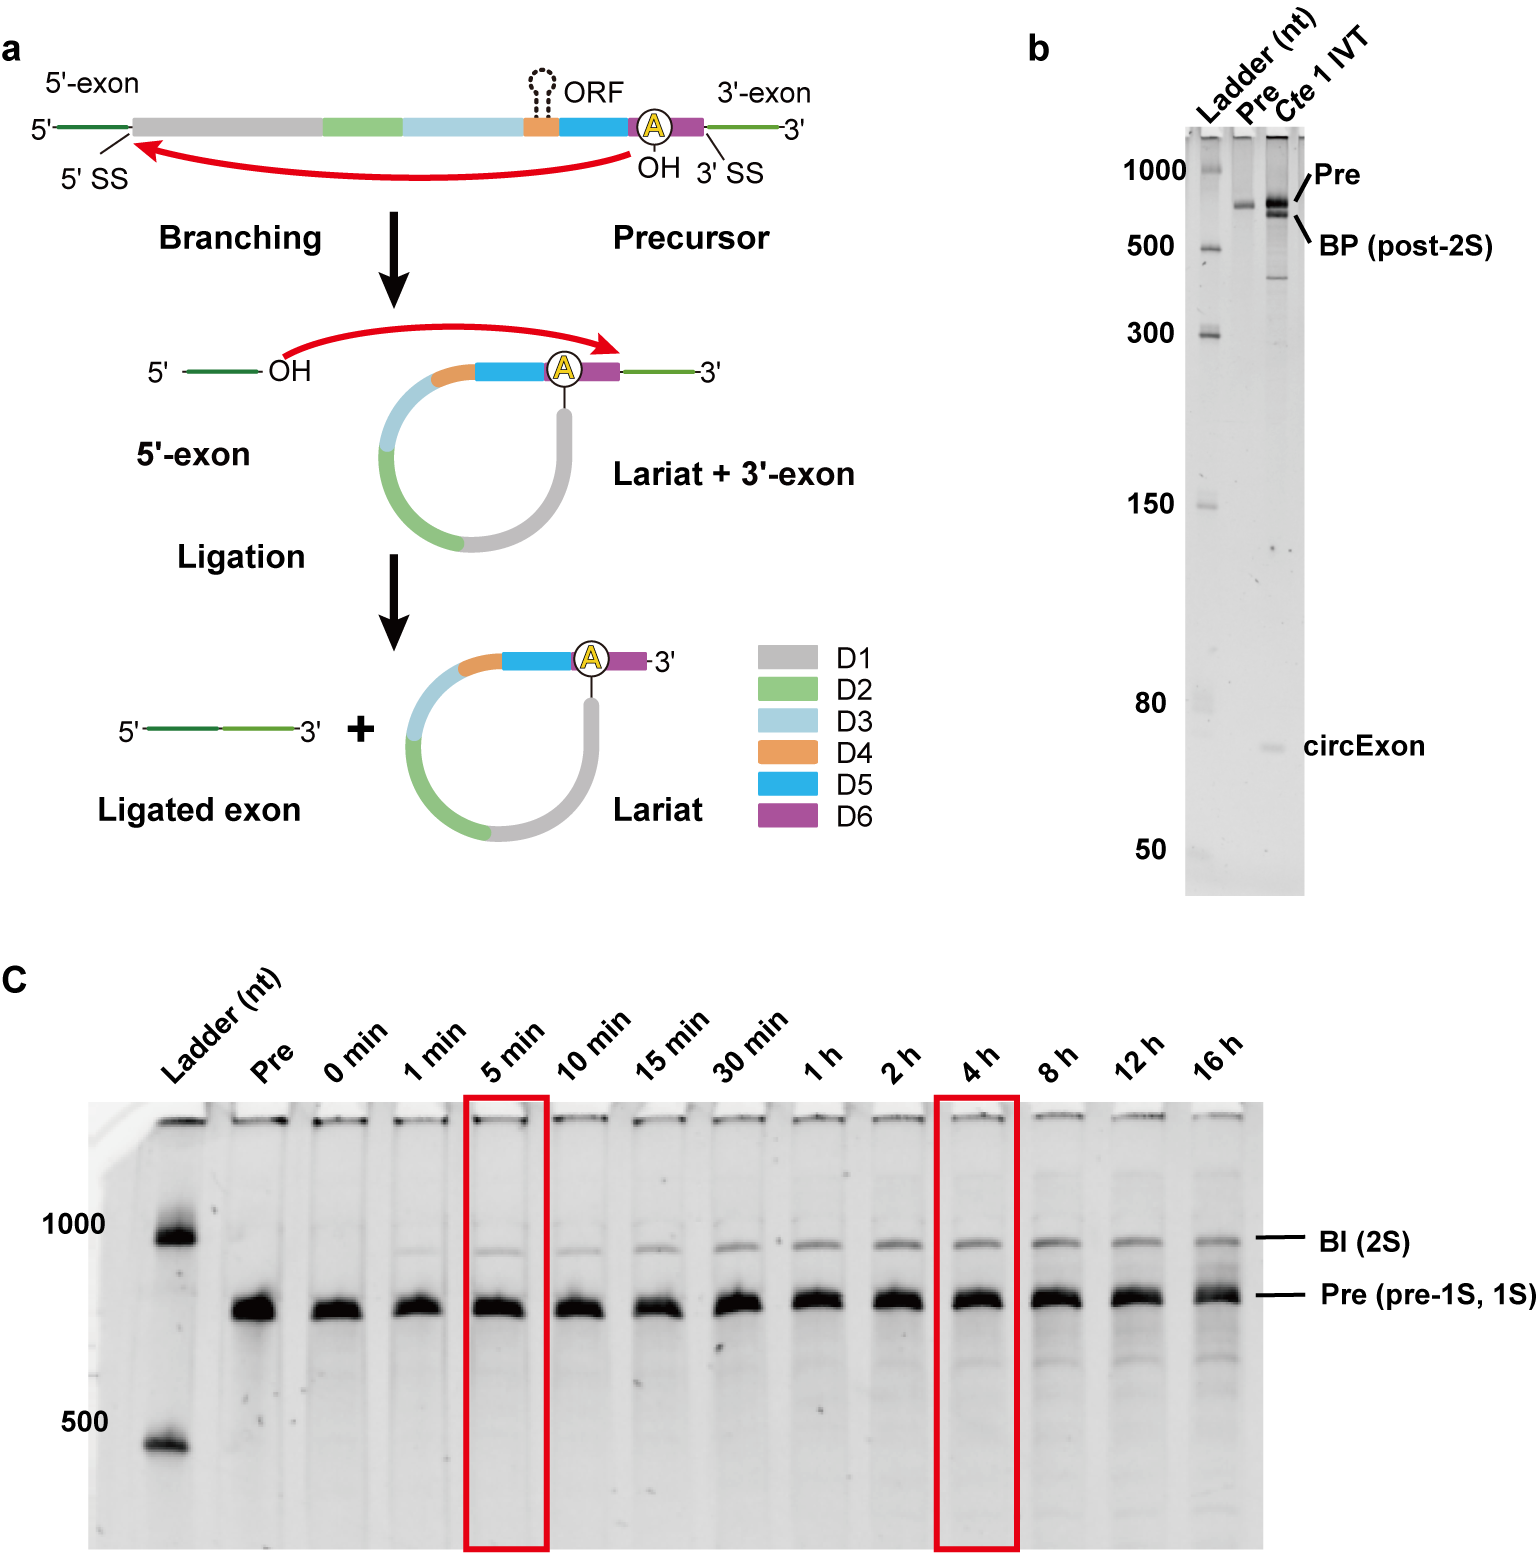


**Extended Data Fig. 1** | ***Cte* 1 CP intron back-splicing compared to canonical group II intron splicing. a.** Schematic representation of canonical group II intron self-splicing to generate linear exon product. **b.** Denaturing gel electrophoresis of *Cte* 1 IVT product. **c.** Denaturing gel electrophoresis of *Cte* 1 Pre RNA splicingin the presence of Ca2+at different time points. Red boxes highlight samples subjected to cryo-EM analysis.


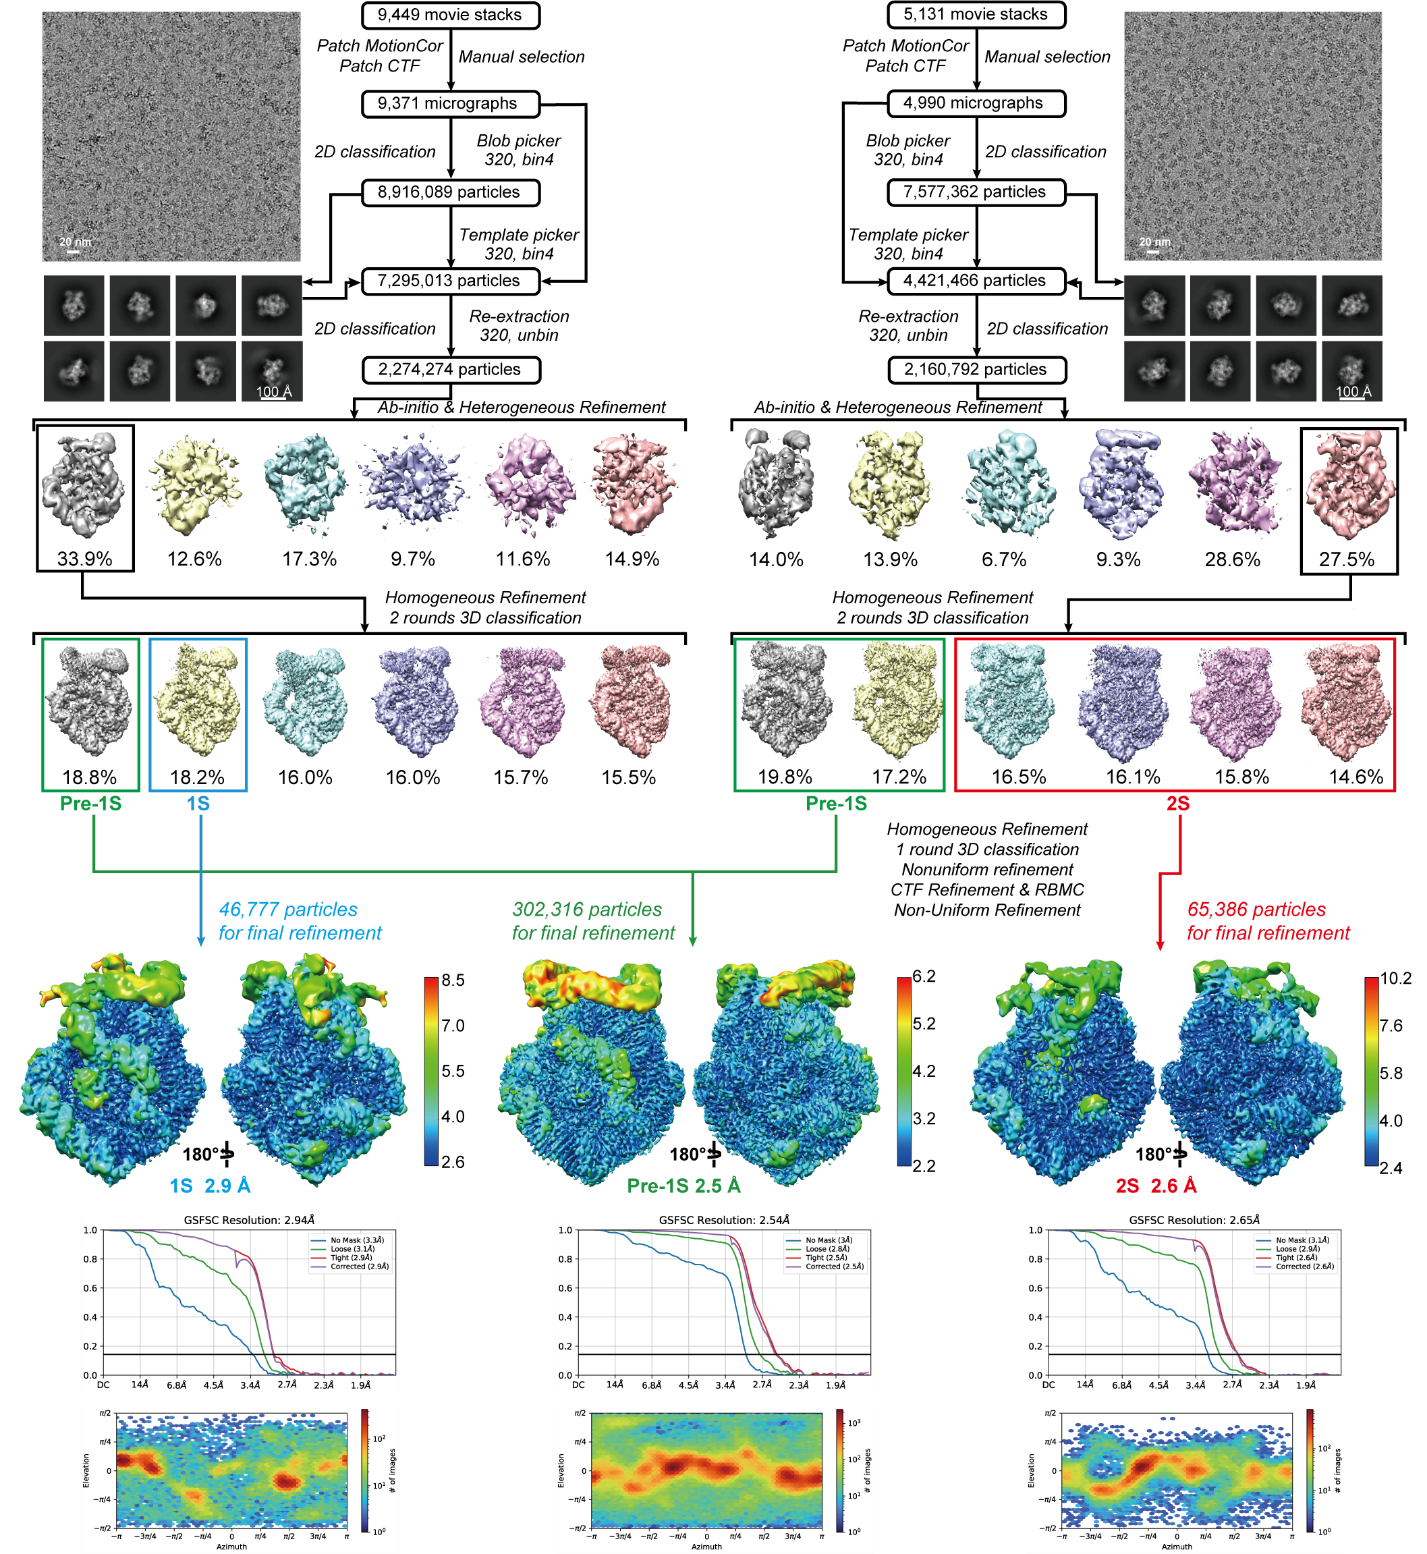


**Extended Data Fig. 2** | **Cryo-EM workflow for the *Cte* 1 Pre RNA splicing products in the presence of Ca2+ at 5 minutes and 4 hours.**

**
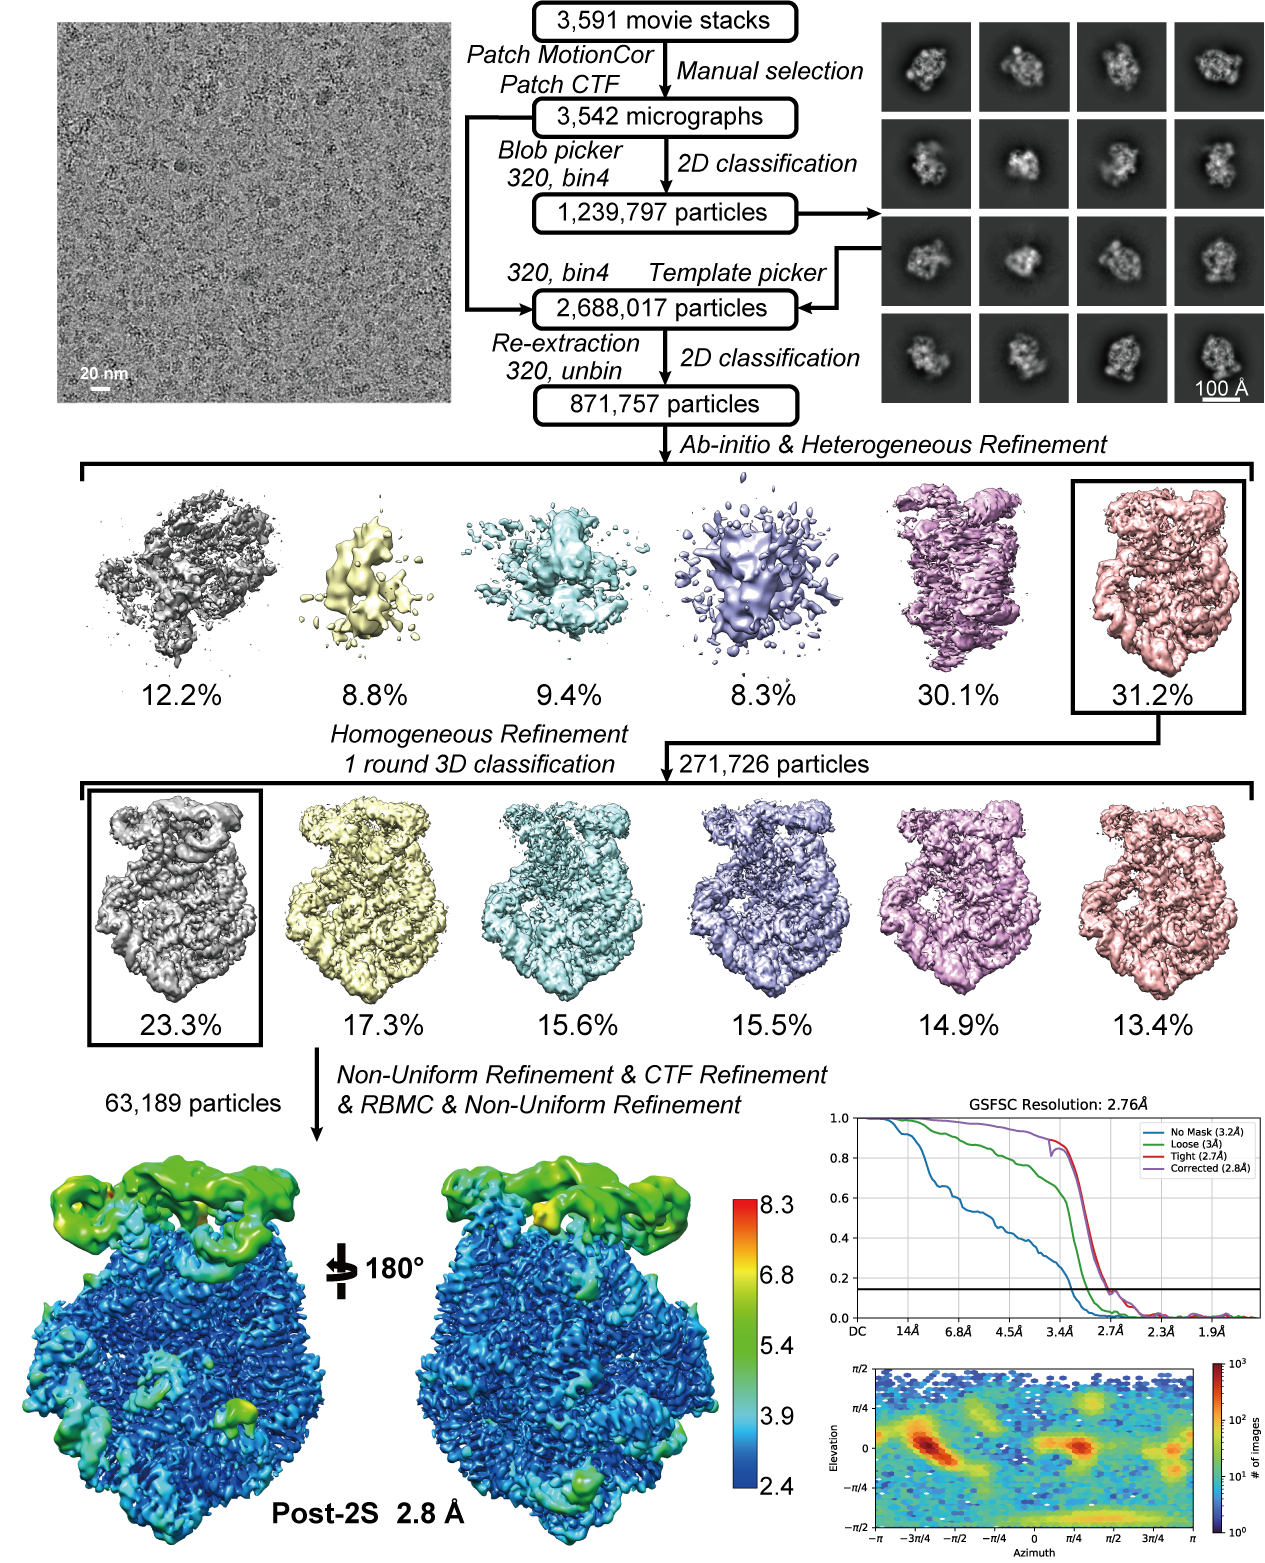
**

**Extended Data Fig. 3** | **Cryo-EM workflow for the *Cte* 1 IVT product**.

**
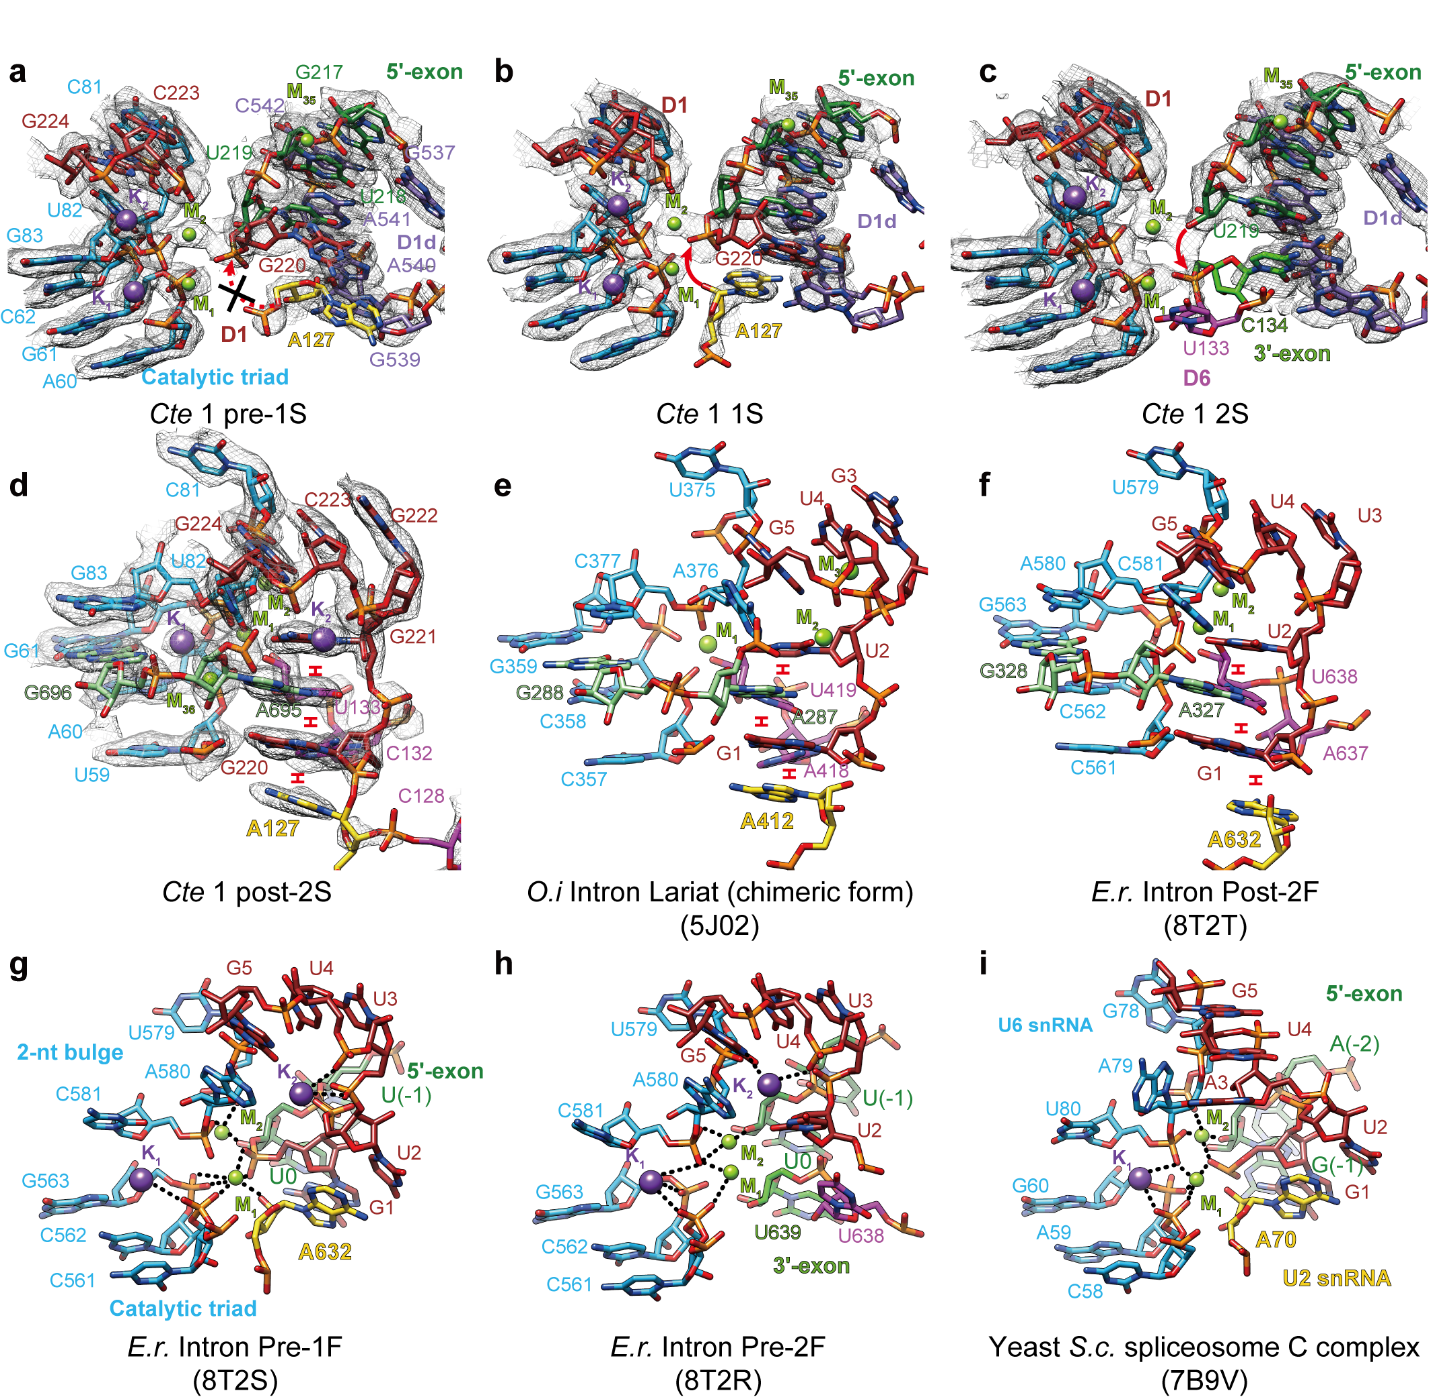
**

**Extended Data Fig. 4** | **The heteronuclear metal ion center in *Cte* 1 intron and comparison to canonical group II introns and spliceosome. a-c.** The cryo-EM maps and models depicting the heteronuclear metal ion center showing EBS-IBS interactions in **a.** pre-1S, **b.** 1S, **c.** 2S, **d-f.** 3'-SS interaction network in **d.** post-2S, **e.** chimeric *O.i* intron lariat (5J02), **f.** *E.r.* intron RNP post-2F (8T2T), and homology to **g.** *E.r.* intron RNP pre-1F (8T2S), **h.** *E.r.* intron RNP pre-2F (8T2R), **i.** yeast *S. cerevisiae* spliceosome C complex (7B9V). Dashed lines denote metal coordination, arrows indicate nucleophilic attacks, base stackings are highlighted in red.


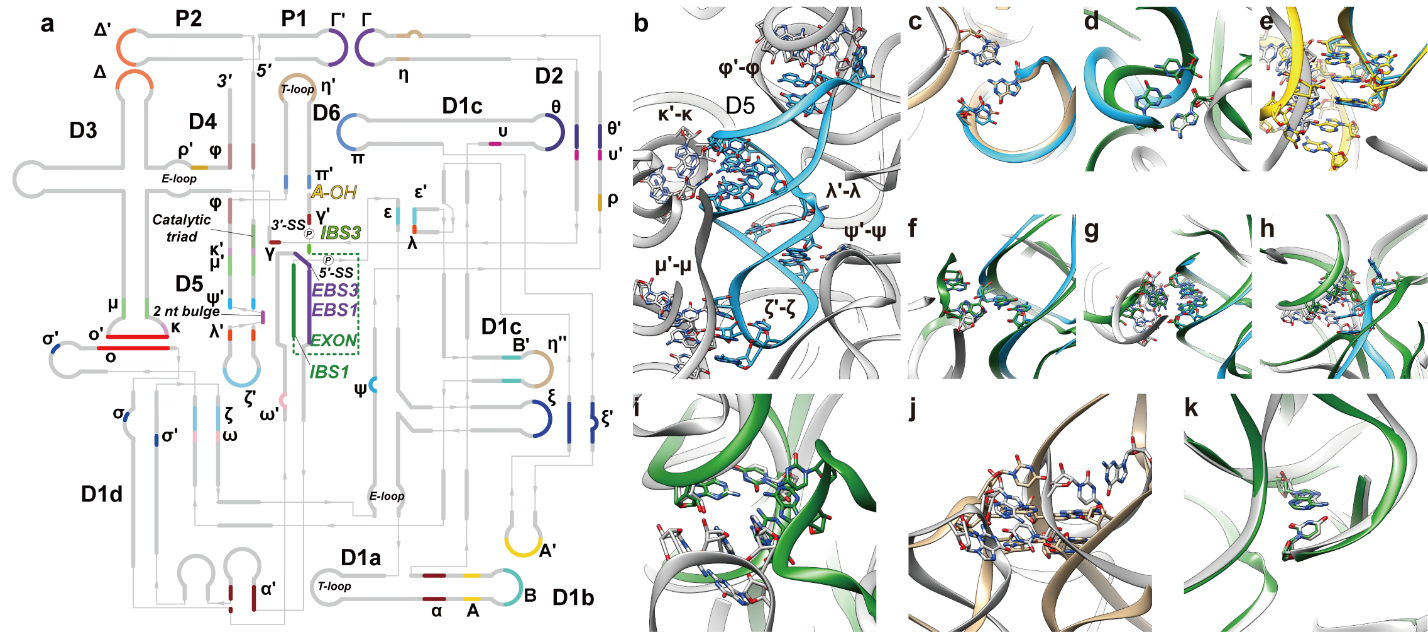


**Extended Data Fig. 5 | Tertiary interactions of D5 and D6 in *Cte* 1 intron compared to canonical group II introns.** **a.** Projected secondary structure with designated tertiary interactions of *Cte* 1 intron based on 3D structures. **b.** Tertiary interactions of D5 (cyan) with D1, D3 and D4 (gray). **c-g.** *Cte* 1 (cyan and gray) tertiary interactions of **c.** ψ'-ψ compared to 6ME0 (tan), **d.** λ'-λ compared to 8T2T (forest green), **e.** ζ'-ζ compared to 4R0D (gold), **f.** κ'-κ compared to 8T2T, **g.** μ'-μ compared to 8T2T, **h.** φ'-φ compared to 8T2T. **i-k.** *Cte* 1 (gray) tertiary interactions of **i.** π-π' compared to 8T2T (forest green), **j.** η-η' compared to 6ME0 (tan), **k.** γ-γ' compared to 8T2T.

**
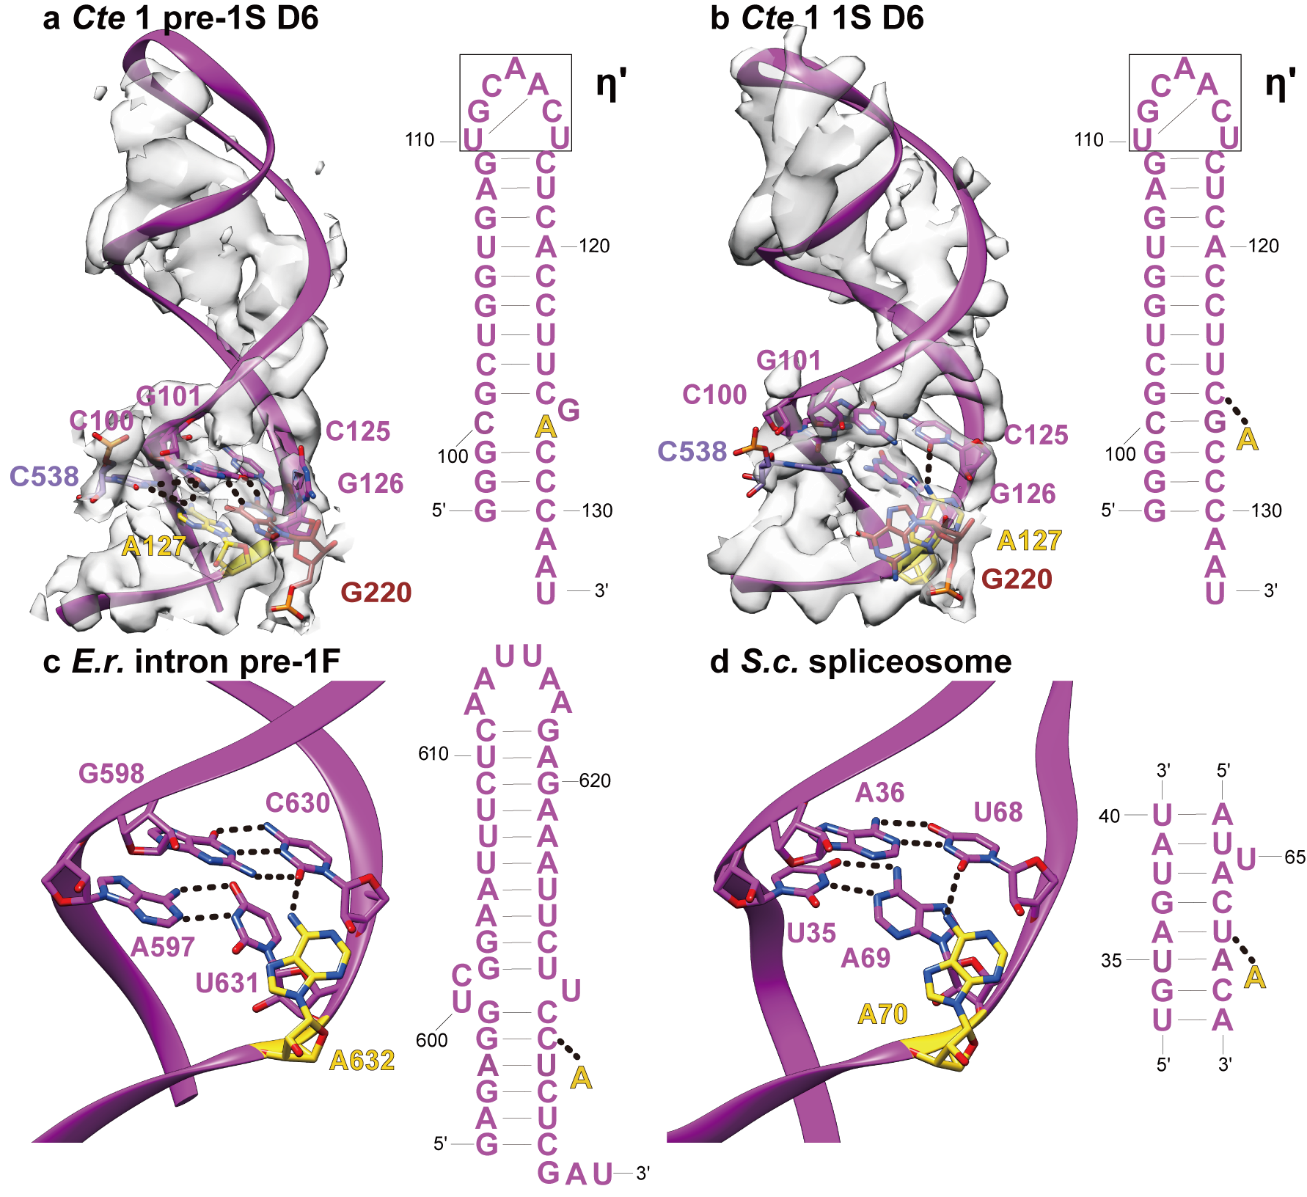
**

**Extended Data Fig. 6 | Local shifts of bulged A between pre-1S and 1S. a.** Secondary structure, cryo-EM density map and model of D6 showing a 2-nt bulge (G126 and A127) in pre-1S, in which two base triples C100-A127-C538 and G101-C125-G220 were formed. **b.** Secondary structure, cryo-EM density map and model of D6 with bulged A127 interacting with G101-C125 in 1S. **c-d.** Analogous bulged A structure in **c**. canonical group II intron *E.r.* intron pre-1F (8T2S) and **d.** yeast *S.c.* spliceosome (7B9V).


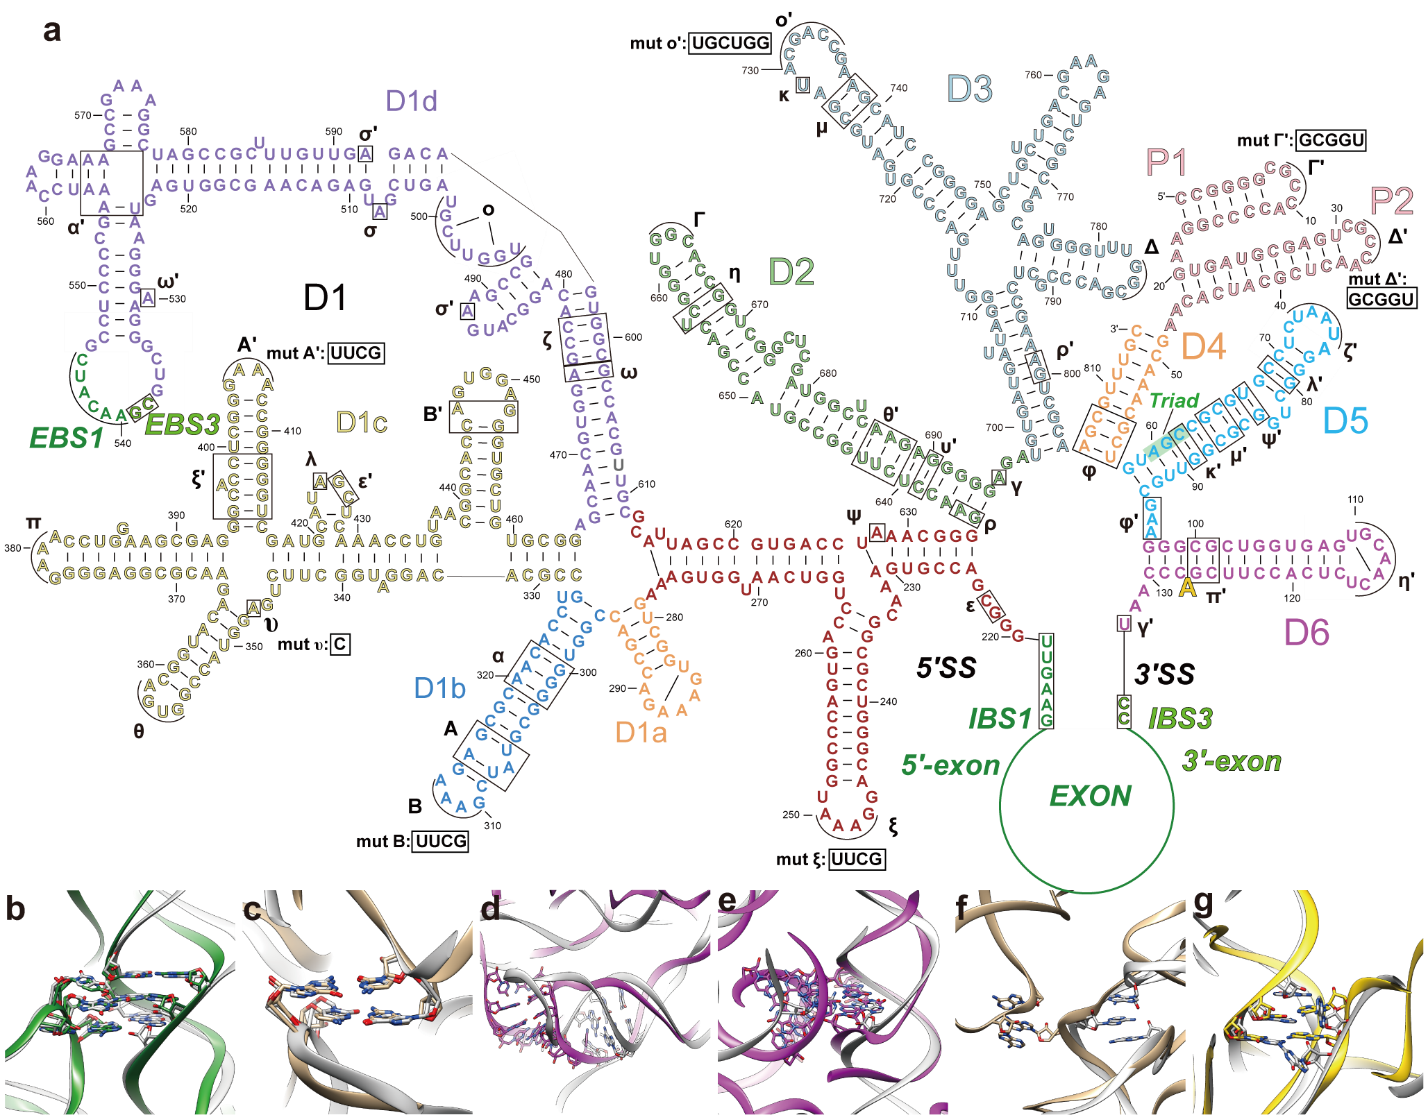


**Extended Data Fig. 7** | **Other tertiary interactions in *Cte* 1 intron compared to canonical group II introns. a.** Projected secondary structures of *Cte* 1 intron. Mutations that disrupt novel tertiary interactions are denoted. *Cte* 1intron (gray) tertiary interactions of **b.** θ-θ' compared to 8T2T, **c.** ε-ε' compared to 6ME0, **d.** α-α' compared to 4E8K (magenta), **e.** ω-ω' compared to 4E8K, **f.** σ-σ' compared to 6ME0, **g.** ρ-ρ' compared to 4R0D (gold). Mutations that disrupt novel tertiary interactions are denoted in the secondary structure on top.

**
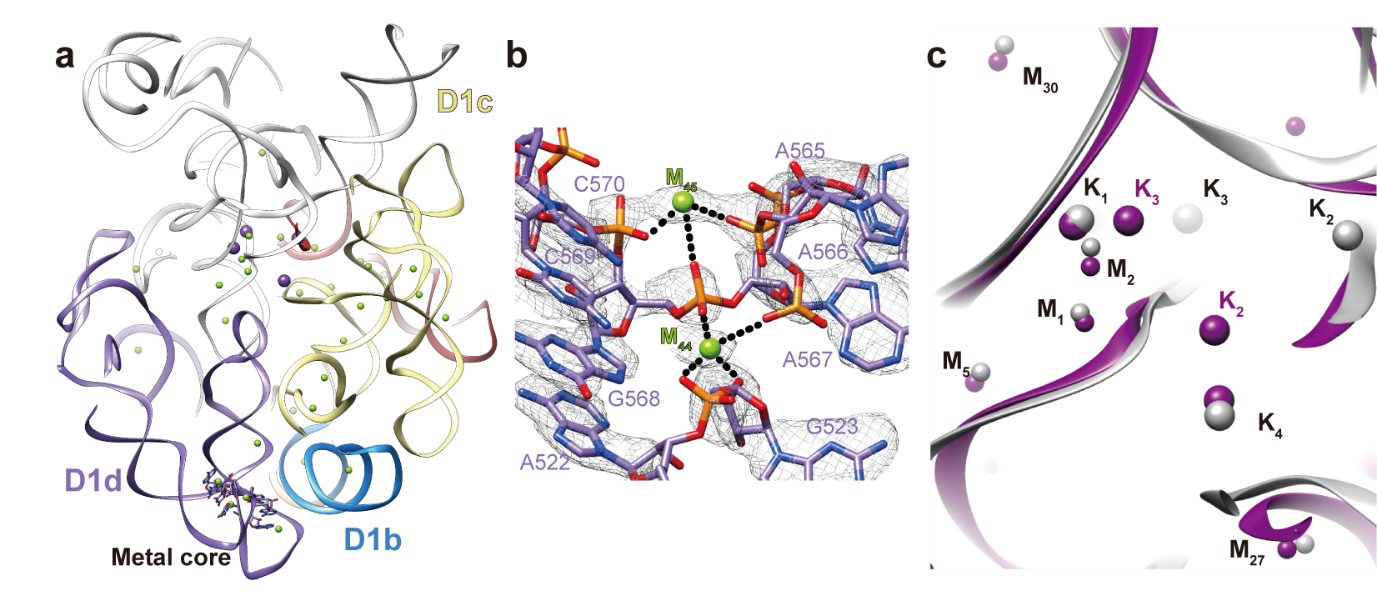
**

**Extended Data Fig. 8** | **Metal ion distribution in *Cte* 1 intron and comparison with *O.i.* group IIC intron (4E8Q). a.** Metal ion distribution shows that most metal ions reside in D1 domain. **b.** The metal core in D1d domain. **c.** Comparison with *O.i*. group IIC intron reveals analogous metal ion-binding sites in the catalytic core.

**
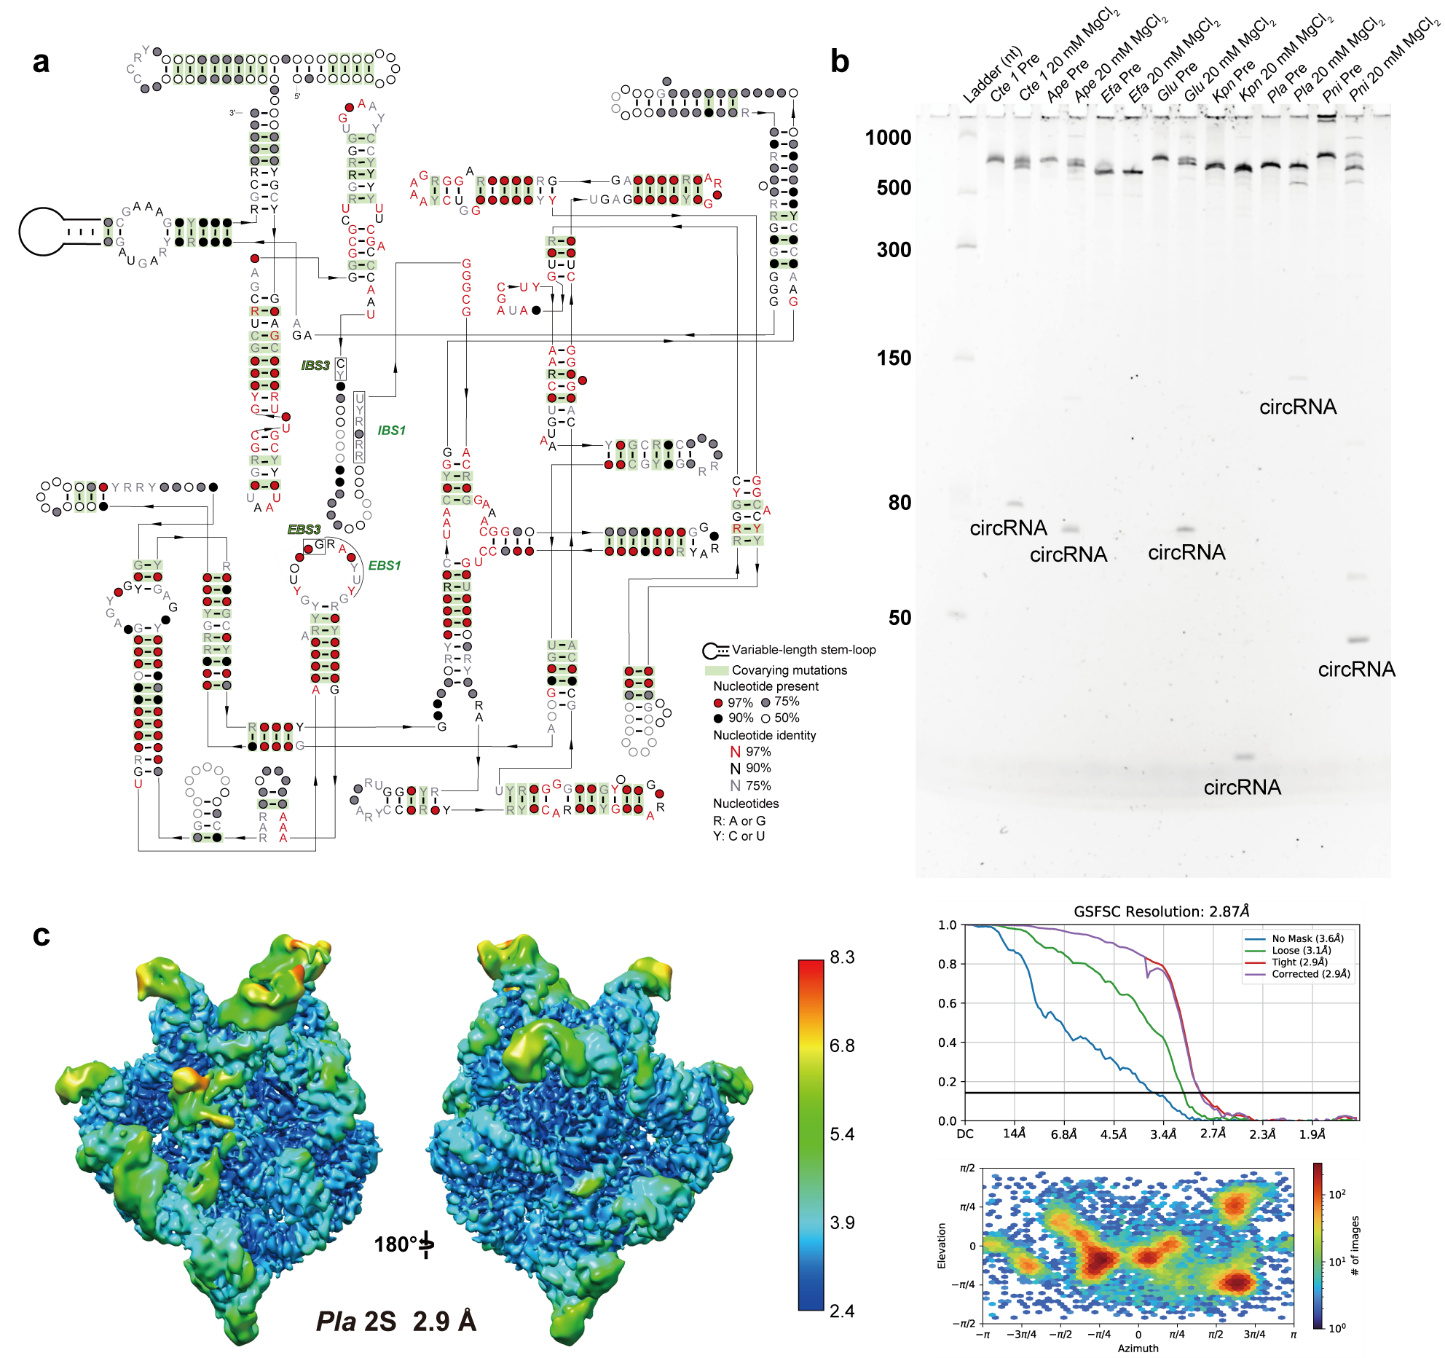
**

**Extended Data Fig. 9** | **Covariation analysis facilitates discovery of novel CP group II introns in other bacteria. a.** Consensus sequence and secondary structure model of CP group II intron, highlighting over one hundred covarying mutation pairs (green boxes). **b.** *In vitro* splicing assay demonstrates catalytic activity of five newly identified CP group II introns from *Ape*, *Glu*, *Kpn*, *Pla*, and *Pni*. **c.** 2.9 Å cryo-EM map of the *Pla* CP-GII intron.


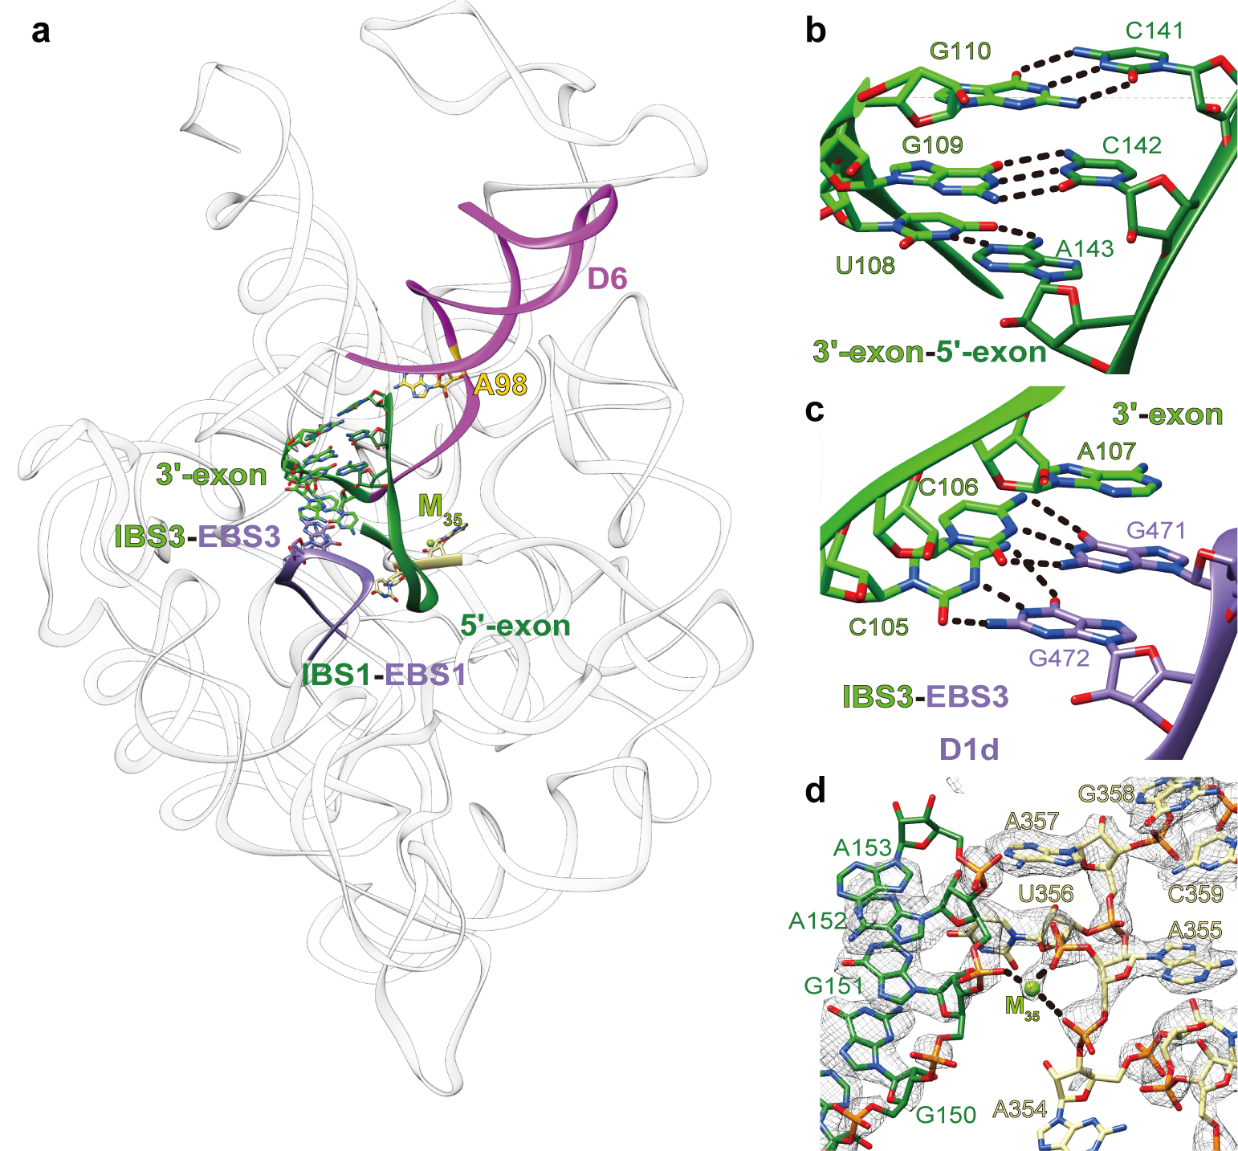


**Extended Data Fig. 10** | **The *Pla* CP intron structure reveals conserved features as those in *Cte* 1 CP intron. a.** The overall structure of *Pla* CP intron. **b.** 5'- and 3'-exon base-pairing interaction. **c.** The 2-bp EBS3-IBS3 interaction motif. **d.** M35 stabilizing the 5'-exon.

Extended Data Table 1 | Cryo-EM data collection, processing and model refinement statistics of different conformations in *Cte* 1 intron self-splicing

| **Data collection and processing** | Pre-1S | 1S | 2S | Post-2S | *Pla* 2S |
| --- | --- | --- | --- | --- | --- |
| Microscope | Titan Krios | | | | |
| Voltage (kV) | 300 | | | | |
| GIF quantum energy filter slit width (eV) | 20 | | | | |
| Detector | Gatan K2 Summit | | | | |
| Nominal magnification | ×165,000 | | | | |
| Pixel size (Å) | 0.85 | | | | |
| Symmetry imposed | C1 | | | | |
| Defocus range (μm) | -0.8 to -1.5 | | | | |
| Electron exposure (e-/Å 2) | 59 | 59 | 59 | 64 | 58 |
| Micrographs (acquired/used) | 14,580/14,426 | 9,449/9,371 | 5,131/4,990 | 3,591/3,542 | 1,478/1,455 |
| Number of extracted particles | 11,716,479 | 7,295,013 | 4,421,466 | 2,688,017 | 811,161 |
| Number of particles after 2D classification | 4,435,066 | 2,274,274 | 2,160,792 | 871,757 | 277,273 |
| Number of particles forwarded to 3D refinement | 302,316 | 46,777 | 65,386 | 63,189 | 33,739 |
| Map resolution at 0.143 FSC criterion (Å) | 2.5 | 2.9 | 2.6 | 2.8 | 2.9 |
| Local resolution range (Å) | 2.2-6.2 | 2.6-8.5 | 2.4-10.2 | 2.4-8.3 | 2.4-8.3 |
| Sharpening B-factor (Å2) | -76 | -52 | -59 | -51 | -45 |
| **Model refinement and validation** | | | | |  |
| Atoms | 15794 | 16087 | 15952 | 15713 | 15216 |
| Residues | 732 | 746 | 740 | 728 | 705 |
| CCmask | 0.81 | 0.75 | 0.71 | 0.75 | 0.77 |
| ResolutionFSC map versus model @ 0.5(Å) | 2.7 | 3.0 | 3.1 | 3.0 | 3.0 |
| Bond length (Å) | 0.003 | 0.003 | 0.003 | 0.003 | 0.005 |
| Bond angle (°) | 0.651 | 0.587 | 0.712 | 0.587 | 0.878 |
| Clashscore | 2.6 | 2.1 | 2.4 | 2.1 | 3.5 |
| Molprobity score | 2.2 | 2.1 | 2.2 | 2.1 | 2.3 |

Extended Data Table 2 | Summary of tertiary interactions of *Cte* 1 compared to canonical group II introns

| Group II intron | *Cte* 1 | Group IIC: 4E8K(*25*) | Group IIB: 4R0D(*32*) | Group IIA RNP: 5G2X(*33*) | Group IIB RNP: 6ME0/6MEC/8FLI(*9, 23*) | Group IIC RNP: 8T2T/8T2R/8T2S(*8*) |
| --- | --- | --- | --- | --- | --- | --- |
| Catalytic core | **√** | **√** | **√** | **√** | **√** | **√** |
| α-α' | **√** | **√** | **√** | **√** | **√** | **√** |
| β-β' | **×** | **×** | **×** | **√** | **√** | **×** |
| γ-γ' | **√** | **√** | **√** | **√** | **√** | **√** |
| δ-δ' | **×** | **×** | **√** | **√** | **√** | **√** |
| ε-ε' | **√** | **√** | **√** | **√** | **√** | **√** |
| ζ-ζ' | **√** | **√** | **√** | **√** | **√** | **√** |
| η-η' | **√** | **×** | **√** | **√** | **√** | **×** |
| θ-θ' | **√** | **√** | **√** | **√** | **√** | **√** |
| ι-ι' | **×** | **×** | **√** | **×** | **√** | **√** |
| κ-κ' | **√** | **√** | **√** | **√** | **√** | **√** |
| λ-λ' | **√** | **√** | **√** | **√** | **√** | **√** |
| μ-μ' | **√** | **×** | **√** | **√** | **√** | **√** |
| ξ-ξ' | **√** | **×** | **×** | **×** | **×** | **×** |
| ο-ο' | **√** | **×** | **×** | **×** | **×** | **×** |
| π-π' | **√** | **×** | **√** | **√** | **√** | **√** |
| ρ-ρ' | √ | **×** | **√** | **×** | **√** | **√** |
| σ-σ' | **√** | **×** | **×** | **×** | **√** | **×** |
| τ-τ' | **×** | **×** | **√** | **×** | **√** | **×** |
| υ-υ' | **√** | **×** | **√** | **×** | **×** | **×** |
| φ-φ' | **√** | **×** | **×** | **×** | **√** | **√** |
| χ-χ' | **×** | **×** | **×** | **×** | **√** | **×** |
| ψ-ψ' | **√** | **×** | **×** | **×** | **√** | **√** |
| ω-ω' | **√** | **√** | **×** | **×** | **×** | **√** |
| A-A' | **√** | **×** | **×** | **×** | **×** | **×** |
| B-B' | **√** | **×** | **×** | **×** | **×** | **×** |
| Γ-Γ' | **√** | **×** | **×** | **×** | **×** | **×** |
| Δ-Δ' | **√** | **×** | **×** | **×** | **×** | **×** |

Extended Data Table 3 | Summary of metal ions identified in *Cte* 1 and *Pla* CP intron structures

| **Site** | **Type** | **Location** | ***Cte* 1**  **Pre-1S** | ***Cte* 1**  **1S** | ***Cte* 1**  **2S** | ***Cte* 1**  **Post-2S** | ***Pla***  **2S** |
| --- | --- | --- | --- | --- | --- | --- | --- |
| **K1** | catalytic cluster | D2-D5 | **√** | **√** | **√** | **√** | **√** |
| **K2** | catalytic center | D1c-IBS1 | **√** | **√** | **√** | **√** | **√** |
| **K3** | catalytic (putative) | D2-D5 | **√** | **√** | **√** | **√** | **√** |
| **K4** | catalytic (distal) | D1c-IBS1-D5 | **√** | **√** | **√** | **√** | **√** |
| **K10** | major groove ion | D1 | **√** | **√** | **√** | **×** | **×** |
| **K19** | major groove ion | D3 | **√** | **×** | **×** | **×** | **×** |
| **K22** | major groove ion | D5 | **×** | **×** | **√** | **×** | **×** |
| **M1** | catalytic cluster | D5-IBS1 | **√** | **√** | **√** | **√** | **√** |
| **M2** | catalytic cluster | D5-IBS1 | **√** | **√** | **√** | **√** | **√** |
| **M5** | magnesium-clamp | D5 | **×** | **×** | **√** | **√** | **√** |
| **M17** | phosphate-bound | IBS1 | **√** | **√** | **√** | **√** | **√** |
| **M24** | phosphate-bound | D2 | **√** | **√** | **√** | **×** | **√** |
| **M27** | magnesium-clamp | D1 | **√** | **√** | **√** | **√** | **√** |
| **M35** | phosphate-bound | IBS1-D1 | **√** | **√** | **√** | **×** | **√** |
| **M36** | phosphate-bound | D5-D6 | **×** | **×** | **×** | **√** | **×** |
| **M37** | GU wobble | D1c | **√** | **√** | **√** | **√** | **√** |
| **M38** | major groove ion | D1c | **√** | **√** | **√** | **√** | **×** |
| **M39** | GU wobble | D1a-D2 | **√** | **√** | **×** | **√** | **×** |
| **M40** | major groove ion | D1 | **√** | **√** | **√** | **√** | **√** |
| **M41** | GU wobble | D1 | **√** | **×** | **√** | **×** | **×** |
| **M42** | major groove ion | D1c | **√** | **×** | **√** | **×** | **×** |
| **M43** | major groove ion | D1d | **√** | **√** | **√** | **√** | **×** |
| **M44** | phosphate-bound | D1d | **√** | **√** | **√** | **√** | **√** |
| **M45** | phosphate-bound | D1d | **√** | **√** | **√** | **√** | **√** |
| **M46** | helix-bound | D1c | **√** | **√** | **√** | **√** | **√** |
| **M47** | GU wobble | D1c | **√** | **√** | **√** | **×** | **×** |
| **M48** | major groove ion | D1c | **√** | **√** | **×** | **√** | **×** |
| **M49** | GU wobble | D1c | **√** | **×** | **√** | **×** | **×** |
| **M50** | major groove ion | D1c | **×** | **√** | **×** | **√** | **√** |
| **M51** | major groove ion | D1c | **×** | **√** | **×** | **√** | **×** |
| **M52** | phosphate-bound | D1c | **√** | **×** | **×** | **×** | **√** |
| **M53** | major groove ion | D1c | **√** | **×** | **×** | **√** | **×** |
| **M54** | major groove ion | D1 | **√** | **√** | **×** | **√** | **×** |
| **M55** | major groove ion | D2 | **√** | **×** | **×** | **×** | **×** |
| **M56** | major groove ion | D1c | **√** | **√** | **√** | **√** | **×** |
| **M57** | phosphate-bound | D1c | **×** | **×** | **×** | **√** | **×** |
| **M58** | major groove ion | D1 | **×** | **×** | **×** | **√** | **×** |
| **M59** | major groove ion | D1 | **√** | **×** | **×** | **×** | **×** |
| **M60** | phosphate-bound | D3 | **√** | **√** | **√** | **√** | **√** |
| **M61** | phosphate-bound | D1c | **√** | **√** | **√** | **√** | **√** |
| **M62** | phosphate-bound | D1d | **×** | **×** | **×** | **√** | **×** |
| **M63** | major groove ion | D1c | **×** | **√** | **×** | **×** | **×** |
| **M64** | major groove ion | D3 | **√** | **√** | **√** | **√** | **√** |
| **M65** | major groove ion | D1 | **×** | **×** | **×** | **√** | **×** |
| **M66** | major groove ion | D5 | **√** | **√** | **√** | **√** | **√** |
| **M67** | phosphate-bound | D1 | **√** | **√** | **√** | **√** | **√** |
| **M68** | phosphate-bound | D3 | **×** | **×** | **×** | **√** | **×** |
| **M69** | phosphate-bound | D1d | **×** | **√** | **√** | **√** | **√** |
| **M70** | phosphate-bound | D1 | **√** | **√** | **√** | **√** | **√** |
| **M71** | phosphate-bound | D1 | **√** | **√** | **√** | **√** | **√** |
| **M72** | major groove ion | D1b | **√** | **√** | **√** | **√** | **×** |
| **M73** | major groove ion | D1d | **√** | **×** | **×** | **×** | **×** |
| **M74** | major groove ion | D1 | **√** | **√** | **√** | **√** | **√** |
| **M75** | major groove ion | D1 | **√** | **√** | **√** | **√** | **×** |
| **M76** | phosphate-bound | D1 | **√** | **×** | **×** | **×** | **×** |
| **M77** | magnesium-clamp | D1 | **×** | **×** | **×** | **√** | **×** |
| **M78** | major groove ion | D1d | **√** | **×** | **×** | **×** | **×** |
| **M79** | helix-bound | D1c | **×** | **×** | **×** | **×** | **√** |
| **M80** | magnesium-clamp | D1 | **×** | **×** | **×** | **×** | **√** |
| **M81** | Major groove ion | D1b | **×** | **×** | **×** | **√** | **√** |

Extended Data Table 4 | Primers and RNA sequences used in this study

| Description | RNA Sequences (5' – 3') |
| --- | --- |
| *Comamonas testosteroni, Cte* 1 | CCGGGGCGCCACCCCGGAAGUGAUGCGAGUCGCCAACUCGCAUCACAAGCAAACGCUGUAGCCGCGUGCCUCUAAUAGGGCUGGCGCGGUUGCGAAGGGCGCUGGUGAGUGCAACUCUCACCUUCGACCCAAUCCAUCUUGCGGCUCAACCCCGCAAGAUCAUCGCCAGACCGCUGGCGGCGUACUGAGUGACAAACGAGGCAAAACCAAAUUGAAGUUGGGCGACCGUGAAACGGCGCUGGGCAGGAAAUGGCCCAGUGACCUGGUCAAUGGUGAAAGUCGGUGAAAGACCGACCGGUGGGGCGUAUCGAAAGAGCGCAACACCUGCCGCACAGGAUGGCUUCUGAGGUACCGGUGACGGUACAGAACGCGGAGGGGAAACCUGGAAGCGAGGGCACCUCGGGAAACCGGGGGUCGAUGCAUAGCUCAAACCUGUAACGGCACCAGUGGAGGGUGCUGUGCGGAGCAACGUGGAGCCACAGGCAUGAAGCCGUGGUUCGUAGUCGAUGAGACAAGCGGUGAGUAAGGGAAGGGCUGCGAACAUCGCCUCCCCGAAAUCCAAGGAAAGCCGAAAGGCUAGCCGCUUUGUUGAGACAGUGGCGCCACGUUGCGCAUUAGCCGUGACCUAAACGGGGAACCUCUUGGCCGUACCGACUCGGGUGGCACCGGUCGGGCUCGAUGGCUCAAGAGGGGGAGAUGUGAUGAUUAGGGUUUGACCCGUGAUGCGAUACGACCGAAGCAUCCGGGGAGCUGUCUGACGAAGAGUCGGCAGCAGUGGGUUUGGCGACCCGCUCCGAAAGUCGCAAGCGUUUGC |
| *Cte* 1 forward primer for IVT DNA template preparation | AACTGAGATACCTACAGCGTGA |
| *Cte* 1 reverse primer for IVT DNA template preparation | (MeG)(MeC)AAACGCTTGCGACTTTCGGA |
| Mutant sequences of *Cte* 1 mut A' | nts 404-407: GAAA to **UUCG** |
| Forward primer for *Cte* 1 mut A' plasmid construction | GCGAGGGCACCTCGG**TTCG**CCGGGGGTCGATGCATAGC |
| Reverse primer for  *Cte* 1 mut A' plasmid construction | GACCCCCGG**CGAA**CCGAGGTGCCCTCGCTTCCAGG |
| Mutant sequences of *Cte* 1 mut B | nts 310-313: GAAA to **UUCG** |
| Forward primer for  *Cte* 1 mut B plasmid construction | CGACCGGTGGGGCGTATC**TTCG**GAGCGCAACACCTGCCGC |
| Reverse primer for  *Cte* 1 mut B plasmid construction | GTGTTGCGCTC**CGAA**GATACGCCCCACCGGTCGGTCTTTC |
| Mutant sequences of *Cte* 1 mut ξ | nts 247-250: GAAA to **UUCG** |
| Forward primer for  *Cte* 1 mut ξ plasmid construction | CGCTGGGCAG**TTCG**TGGCCCAGTGACCTGGTCAA |
| Reverse primer for  *Cte* 1 mut ξ plasmid construction | CTGGGCCA**CGAA**CTGCCCAGCGCCGTTTCACGG |
| Mutant sequences of *Cte* 1 mut ο' | nts 730-735: ACGACC to **UGCUGG** |
| Forward primer for  *Cte* 1 mut ο' plasmid construction | TGATGCGATTGCTTGGAAGCATCCGGGGAGCTGTCTGACG |
| Reverse primer for  *Cte* 1 mut ο' plasmid construction | CCCCGGATGCTTCCAAGCAATCGCATCACGGGTCAAACC |
| Mutant sequences of *Cte* 1 mut Δ' | nts 31-35: CGCCA to **GCGGU** |
| Forward primer for  *Cte* 1 mut Δ' plasmid construction | TCACTATAGGCCGGGG**GCGGT**CCCCGGAAGTGATGCGAGTCGCCAAC |
| Reverse primer for  *Cte* 1 mut Δ' plasmid construction | ATCACTTCCGGGG**ACCGC**CCCCGGCCTATAGTGAGTCGTATTA |
| Mutant sequences of *Cte* 1 mut Γ' | nts 7-11: CGCCA to **GCGGU** |
| Forward primer for  *Cte* 1 mut Γ' plasmid construction | AGTGATGCGAGT**GCGGT**ACTCGCATCACAAGCAAACGCTGTAGCC |
| Reverse primer for  *Cte* 1 mut Γ' plasmid construction | GTGATGCGAGT**ACCGC**ACTCGCATCACTTCCGGGGTGGCGCCCCGG |
| Mutant sequences of *Cte* 1 mut υ' | nt 347: A to **C** |
| Forward primer for  *Cte* 1 mut υ' plasmid construction | GCTTCTG**C**GGTACCGGTGACGGTAC |
| Reverse primer for  *Cte* 1 mut υ' plasmid construction | GGTACC**G**CAGAAGCCATCCTGTGCGG |
| *Acetobacter persici strain DmL_053* | UCGUGCCUAACCAGCACGGGGCAGGGAAGCGGCUUACCACCGUUUCCUGACCUACUGCUGUAGCCGGAUGCCUUUAAUCGGGCUCGUCCGGUUGCAACGGGCGCUCAGGGGUGAAAUCCCCCUGUUCGACCCAAUCGCCUUUAUGUUUCGCACGGGCACCCGUGCCGGUCUUUGACAGUUGUAUAUGGACAUCAAGGAAAGCAAUGAAGUUGGGCGACGUGGACACGGGUGCCCUGGUCGUAACCAGGGCACCCUGCCAGUUGGGAAAGUCGGUAAUCAGCCCGAUCCACGGGAUGCGCGGGAGCGUAUAACGUGUGCCGCACAGGUGGGCGAUGGCAUGAUGGGAAACUGUCAUGGGUCUCAGAGGGGAAACCUGGAUGAGACGGUACUAGGGGGCGCAAGCCGCCUAGAUCAUCGGAUAGCUCAAGCCUGUAACGGCGUUCAGUAGGACGCUGUGCGGAGAGAAAGUGCAAGUGCCGGGGCUUCAGUCCUUCGGUGGGUAAAAUUGGAAGUAACGAUGGUGAGUAAGGGAGACGCUUUGGAACUUCGGUCCCCCCAAAUCGGCAGUUUGUCGAAAGGCUCUGAGAGCCUAGCCACGUUAUGAGAUGCUUGCGUACUACUCGUUAAGAUCCGAUUGGAUAACACGGGAAAGGCUAAGGGCGGCAUCGGUGGUCCCGAUGCAAUGGCCUAUGCCUGGGAGCGGUUUUAGUAGAGUGAAAAUUCCUUCUGCGGUUUAUCCGAAGCAUUAGGAAGAGGCGGUGUUUAAUGAGGGUGGUUCCUCAUGCCGCUAAAGUCUCGAAAGAACUAGGCAGUAGG |
| *Ape* forward primer for IVT DNA template preparation | AACTGAGATACCTACAGCGTGA |
| *Ape* reverse primer for IVT DNA template preparation | (MeC)(MeC)TACTGCCTAGTTCTTTCGAGACTTTAGC |
| *Enterococcus faecalis* strain C7_m1001262Bd0_191120 | CCUUAUUGCCAGUAAGGGGGAGUUAACGAAACUGCCAACUUCGUUAACAGCGACUGCCGAAGCCGUAUGCCUGUAAUUGGGCUGGUACGGCUACGACGGGCGUUCGGGGGUGAAACUCCCCCGUCCGACCCAAUCCGCGCAGAAGCGUGAGGCUGGGCGACACGGAAACGGGAACGUAGGUGACUACGUGAUCCCUGUUGAUCUUGAACGGGUGAAAAUCCCGAAUAUGGGGUGCUUGAGAGGGUACAACAUAUUCCCGACAGGUGGGCUGCUGAGGGCAUCGUGAGGUGUCAGGGCGUUGAGGGGAAACCUGGAAACGUCGGUACUGCGAGGGGCAACCUUUGCAGAUCGCUGUAAAGCUCAAGCCUGUAAUUGCGUCCGAAGAGGUCGCAUUCGGGUAAGUGAUAACCAGCCAUGACUUAAGUGUCUGGCUAUGGUGCUGAAGGCAAAUUAUGAGUAAGGGAGGUGCUUUGGAAUCUCGGCCCCCUGAAAGCCAGAAAUGGUAAGGCGUAGCCUAGUAGUUUGUCUGAGCCAGUGGCGGGUUAUCCCGACAAGAUCAGCUAACGUGGGAAGCACUCUGGAAAAUUUCGGGUGGCACCGAAAUUAGAUUCCUGAGUGUGGGAGAGUGAACGAGUAGGCGCAAAAAUCUACAGGCGAUAUAGCCGAAGUCUGUGGGC |
| *Efa* forward primer for IVT DNA template preparation | AACTGAGATACCTACAGCGTGA |
| *Efa* reverse primer for IVT DNA template preparation | (MeU)(MeU)TGCTGCTTCCAATTTTCCTACCCCCGAA |
| *Gluconobacter sp.* Dm-44 | CCUUACCAGCGUUGGGCAGAGUUUGGCCUUACCAGCCAGGCUCGACCUGUUGCUGUAGCCGGAUGCCUUUAAUCGGGCUCGUCCGGUUGCAACGGGCGCUCAGGGGUGAAAACCCCCUGUUCGACCCAAUCGCCUACUCUGCGCGGCGUGCCGUGCCGGUCUUUGACAAUCGAAUAUGGAUUGAAAAAUACGACCCAAAAGAAGUUGGGCGACGUGGACACGGCGCGCCCUCCCCUCGGUUGGCACCGAGGGCGAGGGCGCUGCCUGCCAGACAGAAAAGUCGGUAAUCAGUCCGAUCCACGGGCGGCAAGGGAUUGUCGAACGUGUGCCAAGCAGGUGGGUGGCAGCAUGGCGGGAAACCGCCAUGAGUCUCAGAGGGGAAACCUGGAUGAGAUGGUACCAGGGGGCGCAAGCCGCCUGGAUCGUCGGAUAGCUCAAGCCUGUAACGGCAACCAGUAGGUUGCUGCUUGGAGAGAAAGUGCAAGUGCCGGGGCCUACAGUGUCCCGGUGGGUAAAGUUGGAAGUCAUGAUGCGAGUAAGGGAGCGGCUUUGGAACUUCGCGCCCCCCAAAUUGGCCGCGCAUAGCGCGGUCGAAAGGCUCUGAGAGCCUAGCGUUCAUGGUGAGACGCUUGCGUACUGCUCGUUAAGAUCCGUCUGGAUAACACGGGAAGGGCUAAGGGCUGCGUCGGGUGGUUCCGACGCGAUAGCCUAUGCCUGGGAGCGGUUUGAGUAGAGUGAAAAUCUGUGCGGCGGUUUAUCCGAAGCUGCACGGAGAGGUUGCGUCAAUCGGGGGUGGUUCCUCGUGCAAUCAAAGUCUCGAAAGAACUAGGCAACAGG |
| *Glu* forward primer for IVT DNA template preparation | AACTGAGATACCTACAGCGTGA |
| *Glu* reverse primer for IVT DNA template preparation | (MeC)(MeC)TGTTGCCTAGTTCTTTCGAGACTTTGAT |
| *Klebsiella pneumoniae* strain SL68 | CUUGGGCGCCACCCAAGGAAUGAGCUGCUGAAGUCGCGUGCCUCUAAUAGGGCUGGCGCGACUACGCUGGGCGCUGGGAACUGCAAUGCUCCCUUCGACCCAAUCCCCCCGGAAAUGGGGAAGCGGGGCGCAAAGCCUCAGUCUUGGGCGACAACGAAACGGGCGCGAGGAGGCAAUGCCUCGAUGUCCCUGAUACACGCGAAAUGGGGUGAAAGUCUCCACGGCGGGCGGCUCGAAAGGGUCGAACGCCUGCACCACACGAUGGCUGCUGAGGUCAGUGAAAGCUGACAGGUCGAUGAGGCGAAAGCUGGAUUCGAUGGCACCGAACGGCGCAAGCCGUGAGGGUCGCUGGAUAGCUCAACCGUGUAACGCUAGUCCGCUGCAGGGAGCUACCUGGGCAGGACGGUUUGGUGAGCUUGUGAUGCGGUGGAUUUGAUGAAGCUGGGAAGUGUUGCAGCGGUAAGGGAGCUUUUUUGGAAGAUUUUGCCCCUGAAACCCCUCGUCUGAGGGUUACGCCGAAAGGCCGCUGAAACAUGGAGCUGACCGCUAAACAAGCGCAGUAGUGGGUAUCUAAGUUGGGAAGCGCUGACGGCCAAUGACCUGGAUGGCACCAGGUAGGCACAAGCGUGGGAGAUCCGGUGAGUACGAGCCGGGAAAUGGCUGAGUCAAACGGUCAGAUCCCGAUCCCUUCGGGGGUAGGAAAAUUGGAAGCAGCAAA |
| *Kpn* forward primer for IVT DNA template preparation | AACTGAGATACCTACAGCGTGA |
| *Kpn* reverse primer for IVT DNA template preparation | (MeU)(MeU)TGCTGCTTCCAATTTTCCTACCCCCGAA |
| *Paracandidimonas lactea* strain Q2-2 | AGCAGGCGCCACCUGCUGCGGAACCGCUGAAGCCGCGUGCCUCUAACAGGGCUGGCGCGGCUACGAAGGGCGCUGGGGGUGGGAACCACCUCCUUCGACCCAAUCCAUGGCCUGCGCCGCAACGUGCAGGCCAGCAGUCUCCACGACAAGGAGGGGCGACUACGAAACGGGCCUGGGUAGGAAAUGACCCAGUGACCCUGACAGUUUGGGAAAGUCGGUGAAAGCCCGACCCUCGGGGCCUAGCGAAAGUGGGCGACGAGUGCAACACCUGGAGGCUGAGGGCGUCAGUGAUGGCGUCAGGCAUGCGGGAGAAAUCUAGGCAUGCUGGCACCUAUCGAAAGAUGGGGCCGCUGGAUAGCUCAAUCAGGUAAAGGCACCGUUCAGGUGCUGUGUUGAGGCAUAGGAAGGCAGGGCCGCAGUCGCGGUAAGCAAGCAGCGUUGAAGCGCAUCGGCAGUACCGCAUCCGUUAUGGAACCUUGGGAGCGAGAAACCCUGGAAACGGGGGUAGGGUCAGAGACCUAGAUAAAUCCGAUGUGGCCGAGCUGGCUGUCGUUCGAUGCCGUAGUACUGACUGUCUAAGUAGGGAAGGUCUCGGCAGAUCGUGGGGGUGGCACCCUGCGAAAUUAUCUGCCAAGACUGGGAGAUGGCUUGAGUAGUGCCGCCGCGCGAGCGGUGGGCAGACCAUGGGGGCAGACUUGCUGGAUGUUCCUAUCGGCGAAAGAGCCAAGCGGUAAC |
| *Pla* forward primer for IVT DNA template preparation | AACTGAGATACCTACAGCGTGA |
| *Pla* reverse primer for IVT DNA template preparation | (MeG)(MeU)TACCGCTTGGCTCTTTCGCCGATAGGAACA |
| *Pollutimonas nitritireducens* strain JR1/69-2-13 | GUCACCUGCCCCAUCGGUCGCCAACCGAUGGGGUCAGUAACCGCCGUAGCCGGAUGCAUCUAACCAUGCUCGUCCGGCUGCGAAGGGCGCUGAGCGGGGGAACCCCGCUCUUCGACCCAAUCCGUAUCAGGCGCAAUGCGCAAAGCGCAAAGCCCCAUGAGCAAUGCACCUUGCGCAUUGCGCCAAGUCGGAGAUUGGGCGACCAGGAAACGGGCUCGCGCAGGAAAUGGCGCGAUGUCCCUGGCAGAUGGGAAAAGCCGGUAUCCAGUCCGGCCCACGGGGCUUAUCGAAAGAGGGCGACGUGUGCGACAGACGAGGGCUUAGGGUCGUGGCAACACGAUCAGGCCAUCAGCAGAAAUGCGAGAUGGUCGGCACCUCCAGAAAUGGGGGGUCGAUGGACAGCUCAACCGUCUAAAUGCGCCGUAAGGGCGCUAUGUCGAGCAGUGCAAAGGCAGUGCCGCACCAAAGGUGCGGUAAGCGAGAAGCGAUGAAGCGAACGACCAGUACCUGAUCCGUUUUGGAAUCUUGGGACAGGGAAACCCUCAGAGCAUCGAGGGGUAGGGUCUUAGACCUAGAAAUAUGUCGUUUAGCCGAGCUUGCUGUCGUUGUGCUGUGCAGUACCCGCUGUCUAACUGGGGAAGGUCUGGCCGGGCAAUGCGGUGUGGCAACCGUGUUGAGGCACCUGAUCAGACUGGGAGCGGCUUGAGUAGCCACAGAUGGGCGUAAGCCUGUCGAGUGGGAGCCUCCAUGCACACUCGCUGCGUGUGUGGAAGGUCGAAAGAGCUAGGCGGUAAA |
| *Pni* forward primer for IVT DNA template preparation | AACTGAGATACCTACAGCGTGA |
| *Pni* reverse primer for IVT DNA template preparation | (MeU)(MeU)TACCGCCTAGCTCTTTCGACCTTCCACAC |
