# Supplementary material for: Structural basis of circularly permuted group II intron self-splicing
Source: Research Square preprint supplement (doi:10.21203/rs.3.rs-3888028/v1), 2024-10-01
Supplement: Supplementary file 2 [file c96a4215af0ef84ce44df09d.docx]

Extended Data


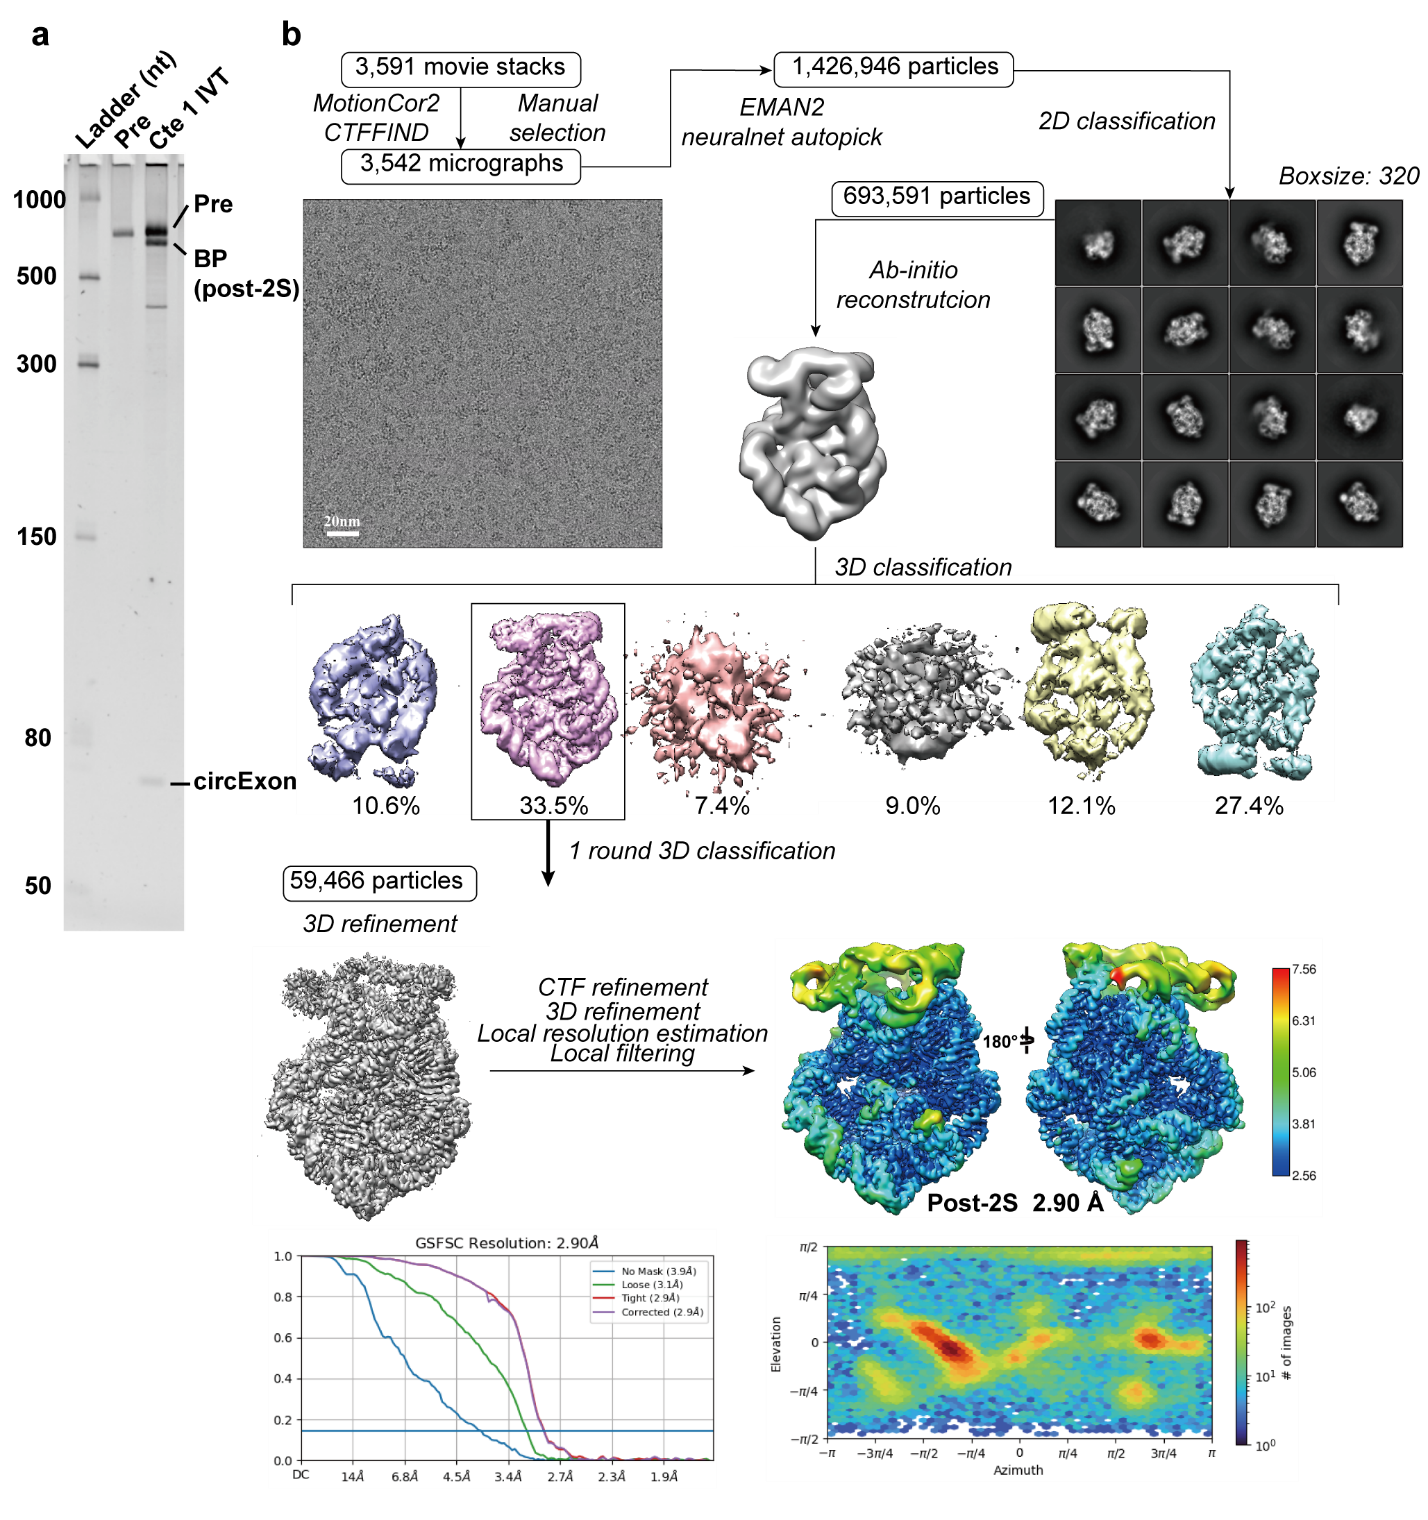


**Extended Data Fig. 1** | **Cryo-EM workflow for the *Cte* 1 IVT product. a.** Denatured gel electrophoresis of *Cte* 1 IVT product. **b.** Cryo-EM workflow.


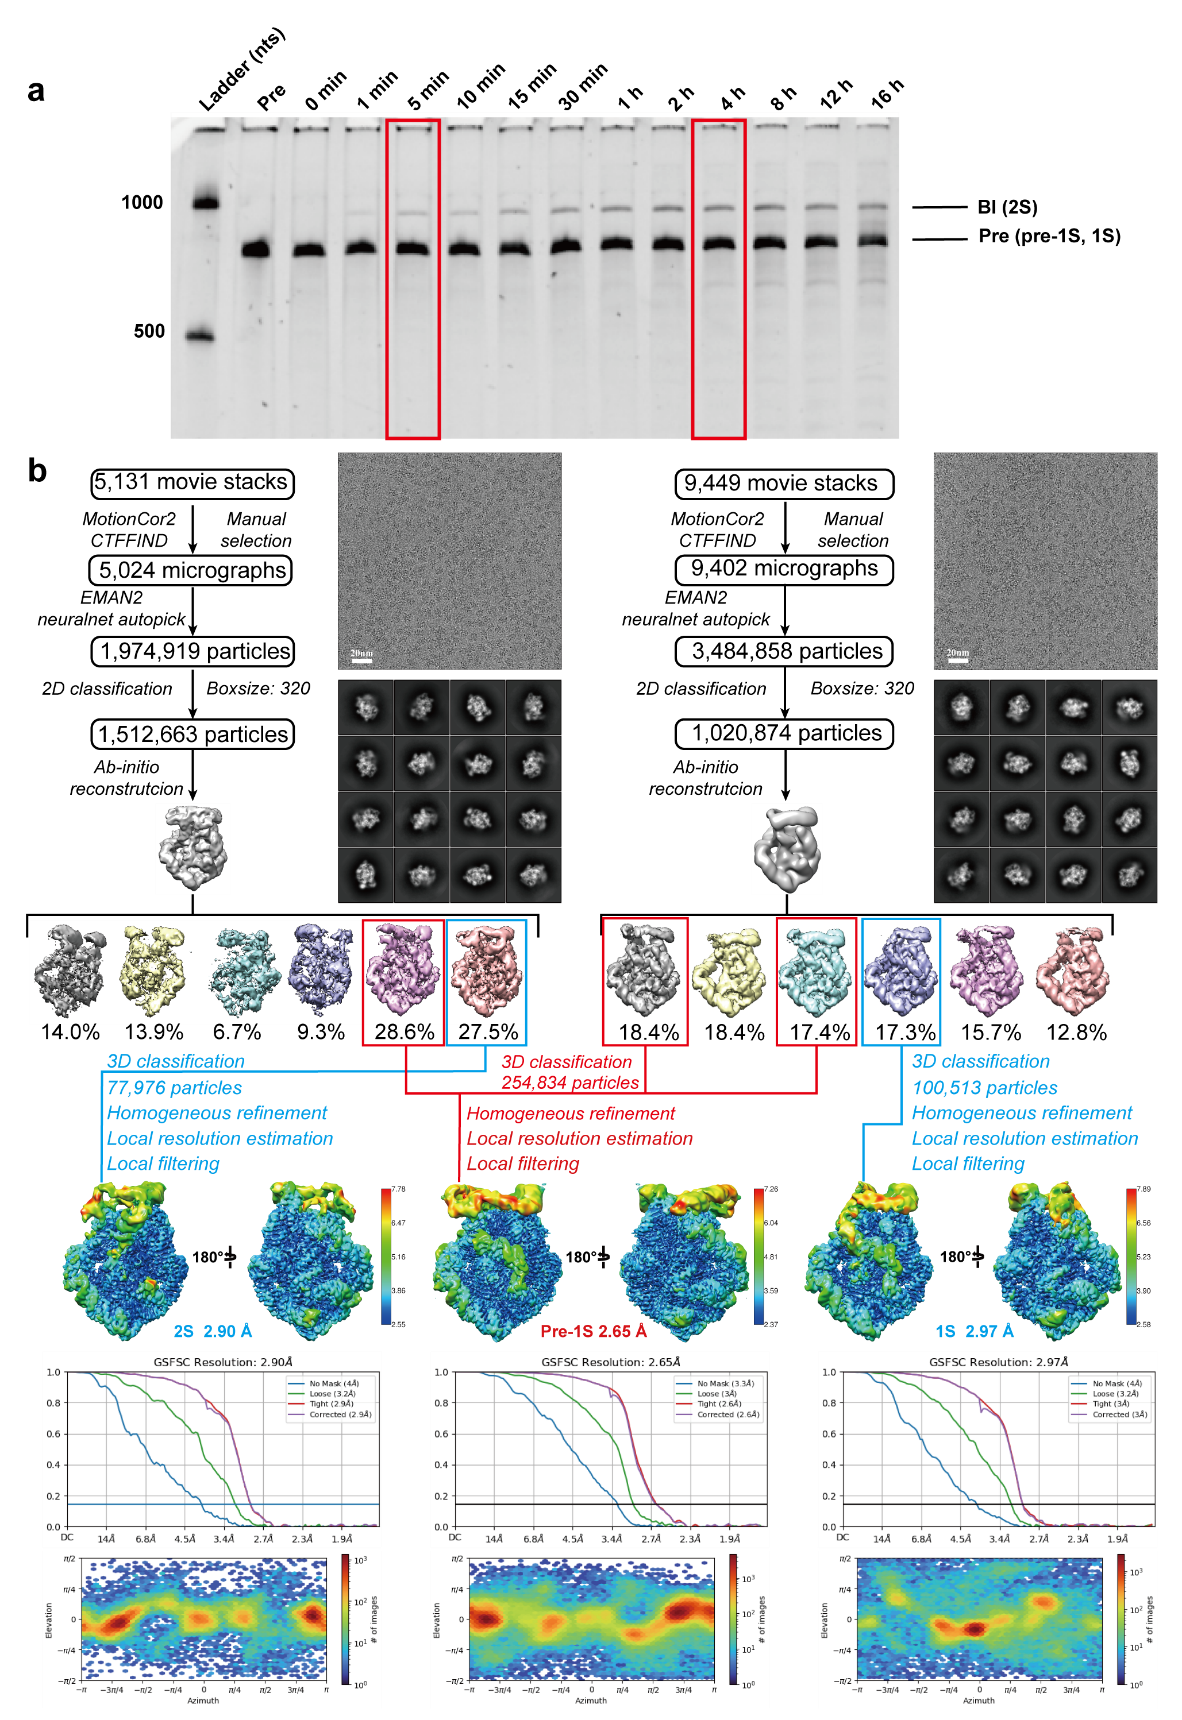


**Extended Data Fig. 2** | **Cryo-EM workflow for the *Cte* 1 Pre RNA splicing products in the presence of Ca2+. a.** Denatured gel electrophoresis of *Cte* 1 Pre RNA splicing at different time points. **b.** Cryo-EM workflow of *Cte* 1 Pre RNA splicing products at 5 min and 4 h (red boxes).


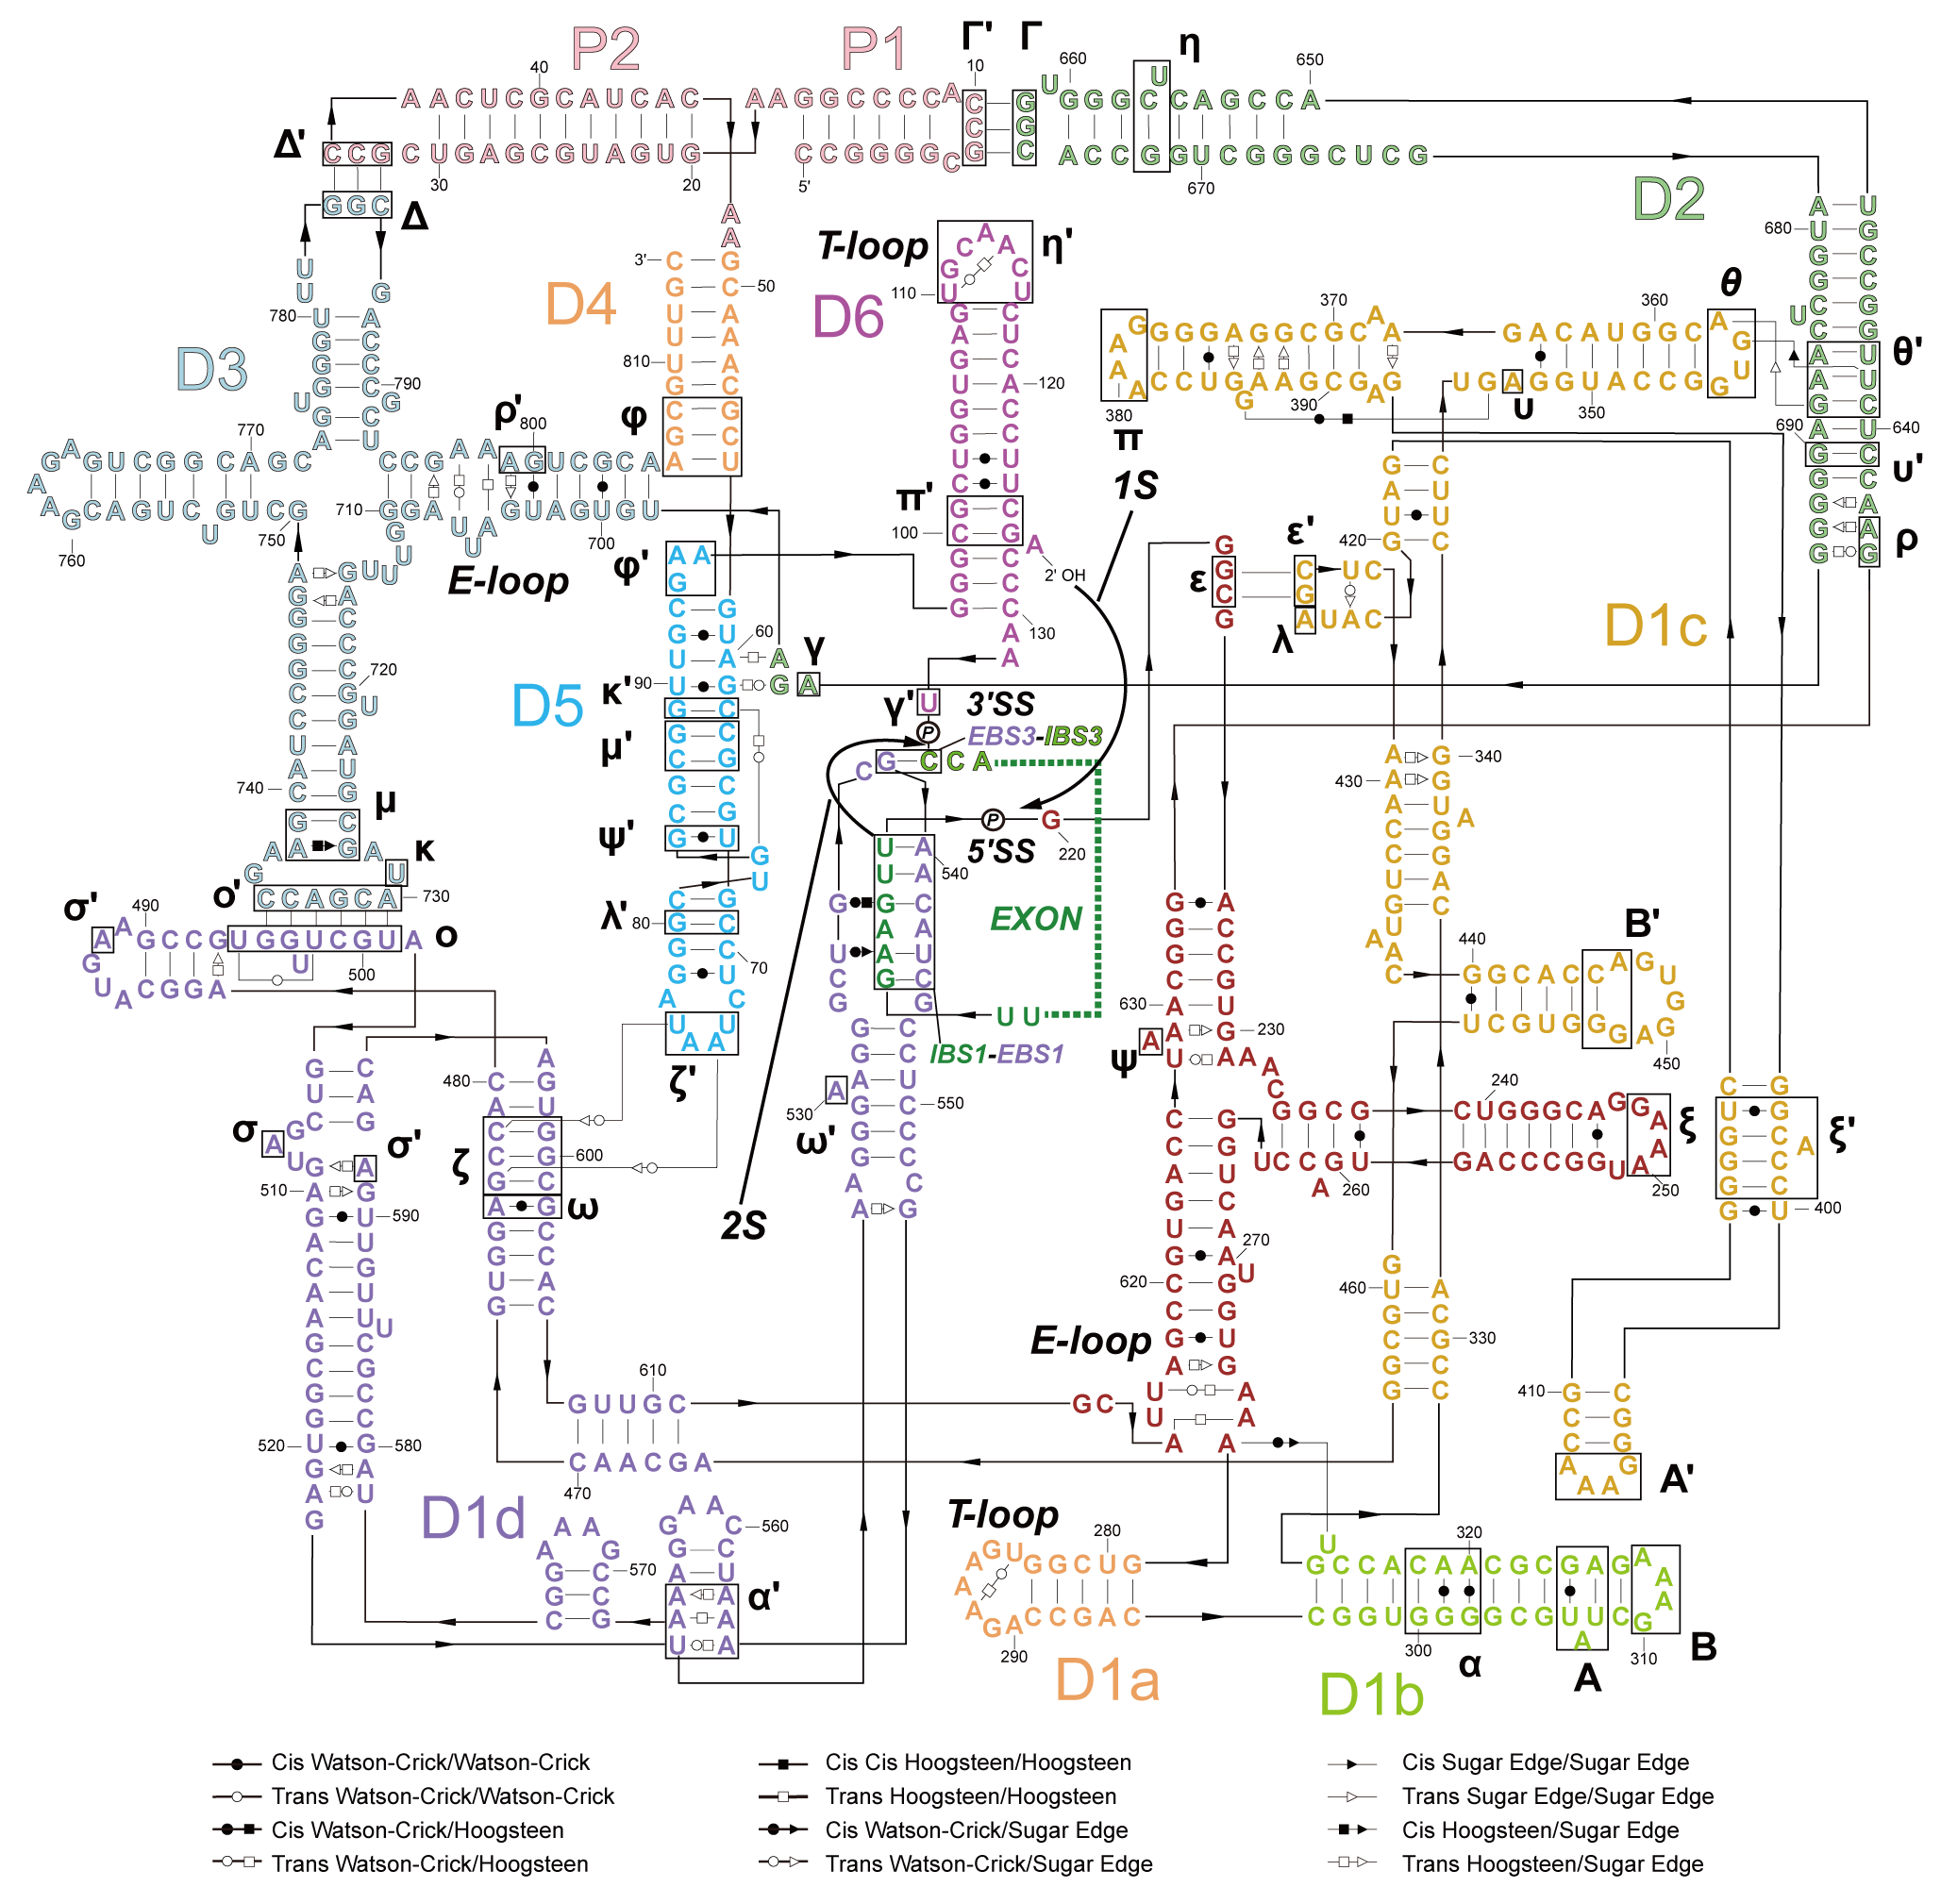


**Extended Data Fig. 3** | **Secondary structure diagram projected from cryo-EM structure of *Cte* 1 intron.**


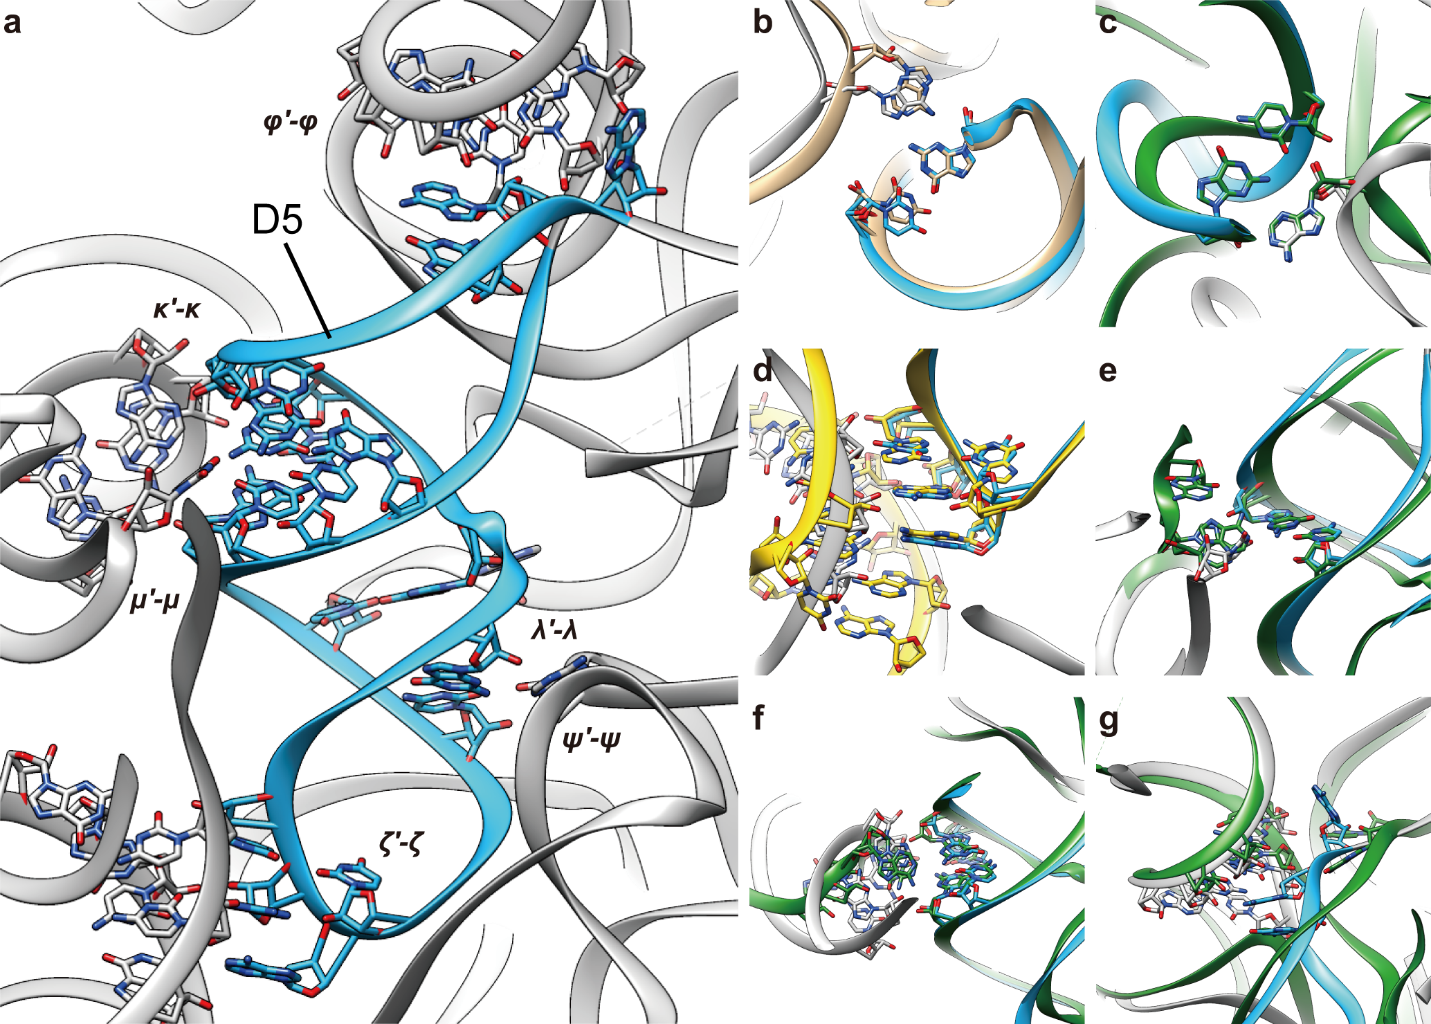


**Extended Data Fig. 4** | **Tertiary interactions of D5 with D1, D3 and D4 in *Cte* 1 intron compared to canonical group II introns.** *Cte* 1intron tertiary interactions of **a.** D5 (cyan) with D1, D3 and D4 (gray), **b.** ψ'-ψ compared to 6ME0 (tan), **c.** λ'-λ compared to 8T2T (forest green), **d.** ζ'-ζ compared to 4R0D (gold), **e.** κ'-κ compared to 8T2T, **f.** μ'-μ compared to 8T2T, **g.** φ'-φ compared to 8T2T.


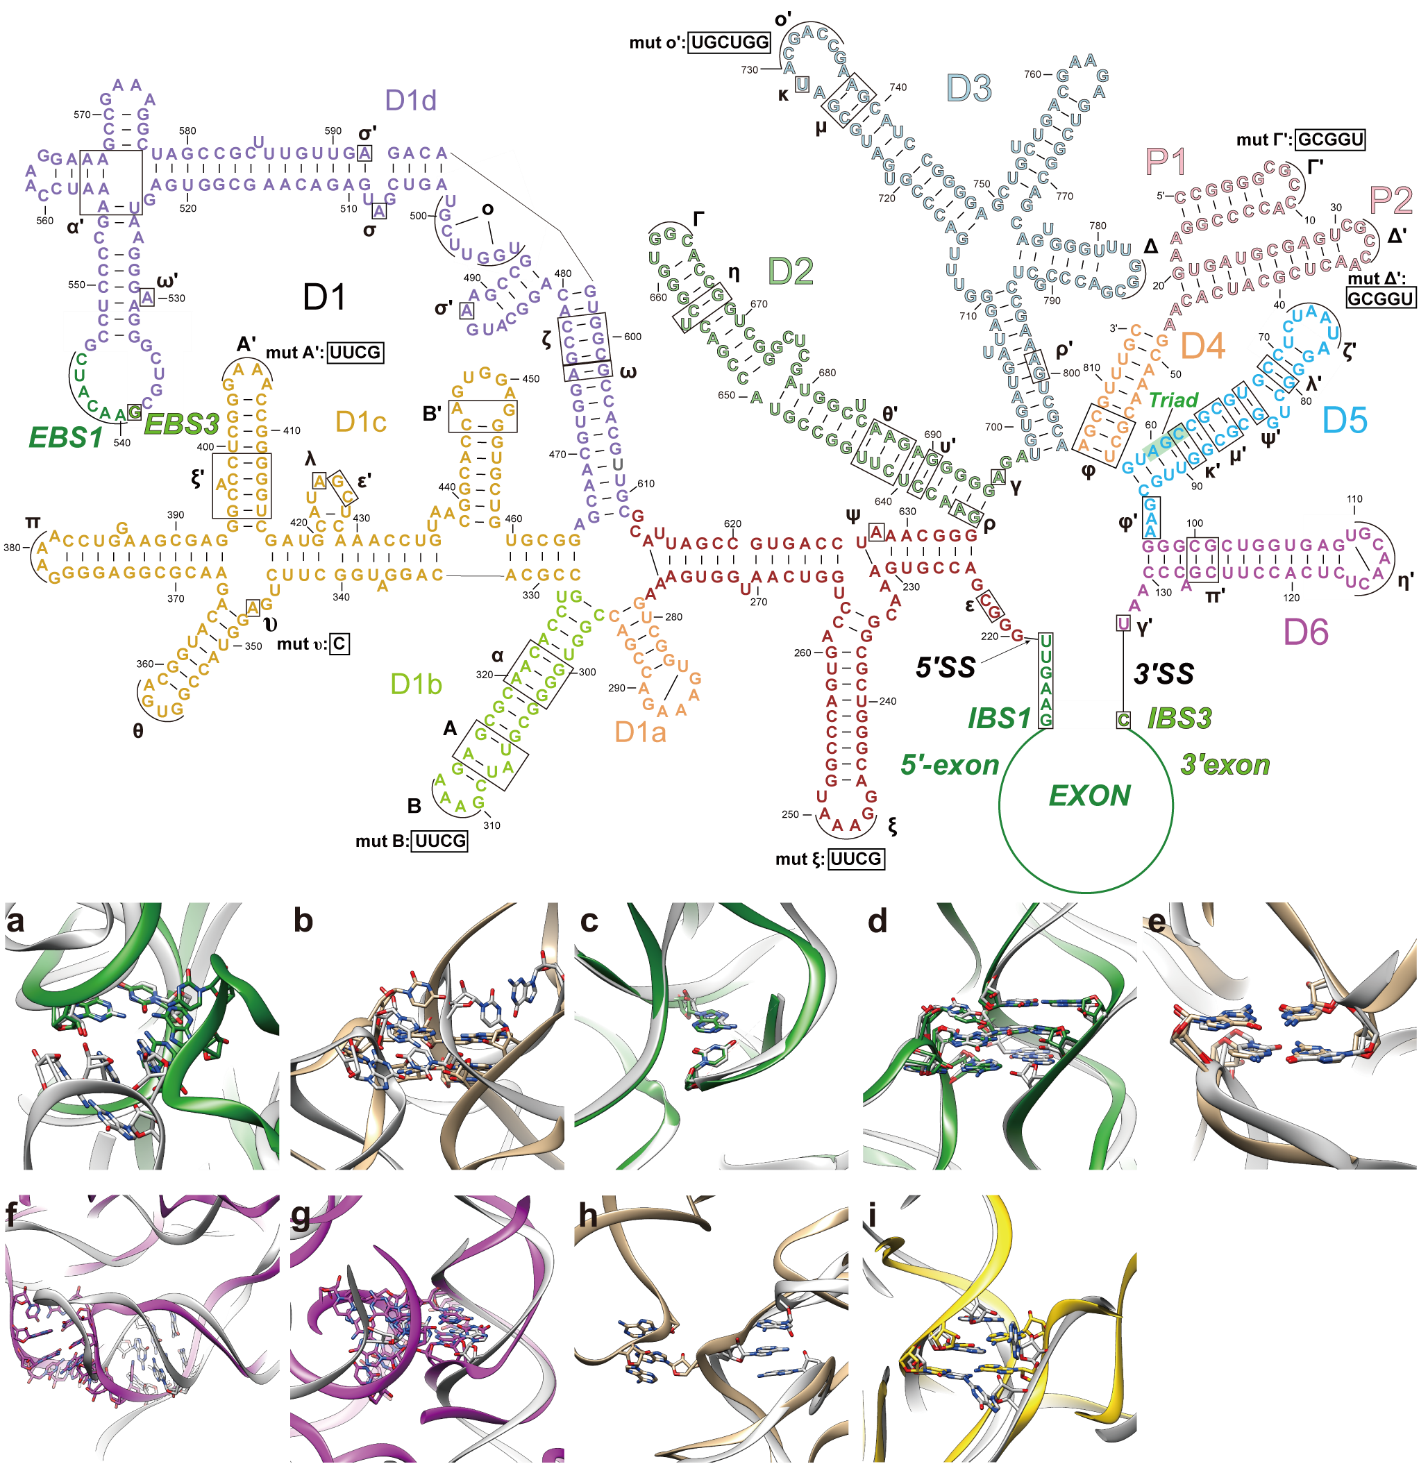


**Extended Data Fig. 5** | **Other tertiary interactions in *Cte* 1 intron compared to canonical group II introns.** *Cte* 1intron (gray) tertiary interactions of **a.** π-π' compared to 8T2T (forest green), **b.** η-η' compared to 6ME0 (tan), **c.** γ-γ' compared to 8T2T, **d.** θ-θ' compared to 8T2T, **e.** ε-ε' compared to 6ME0, **f.** α-α' compared to 4E8K (magenta), **g.** ω-ω' compared to 4E8K, **h.** σ-σ' compared to 6ME0, **i.** ρ-ρ' compared to 4R0D (gold). Mutations that disrupt novel tertiary interactions are shown in the secondary structure on top.


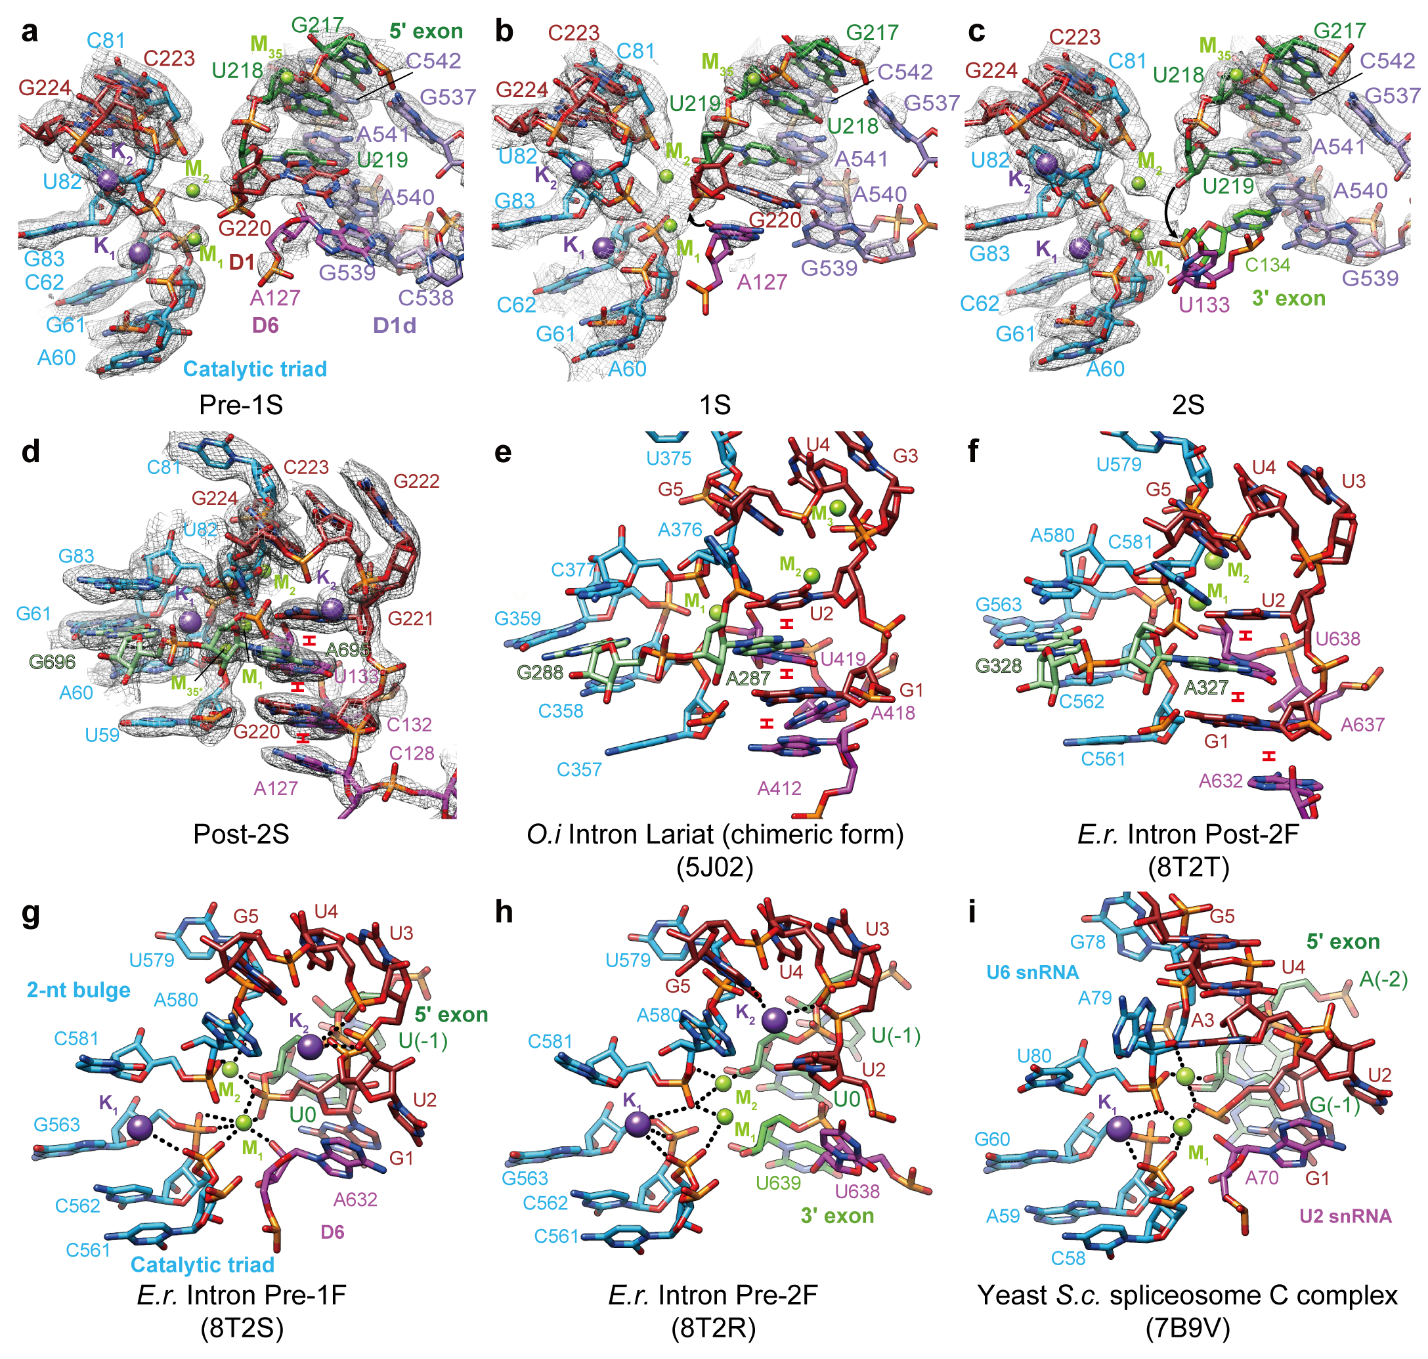


**Extended Data Fig. 6** | **The heteronuclear metal ion center in Cte 1 intron compared to canonical group II introns and spliceosome. a-c.** The cryo-EM maps and models of the heteronuclear metal ion center that shows EBS-IBS interactions in **a.** pre-1S, **b.** 1S, **c.** 2S, **d-f.** 3'-SS interaction network in **d.** post-2S, **e.** Chimeric *O.i* intron lariat (5J02), **f.** *E.r.* intron RNP post-2F (8T2T), and homology to **g.** *E.r.* intron RNP pre-1F (8T2S), **h.** *E.r.* intron RNP pre-2F (8T2R), **i.** yeast *S. cerevisiae* spliceosome C complex (7B9V). Dashed lines represent metal coordination, arrows indicate nucleophilic attacks, base stackings are label in red.

***
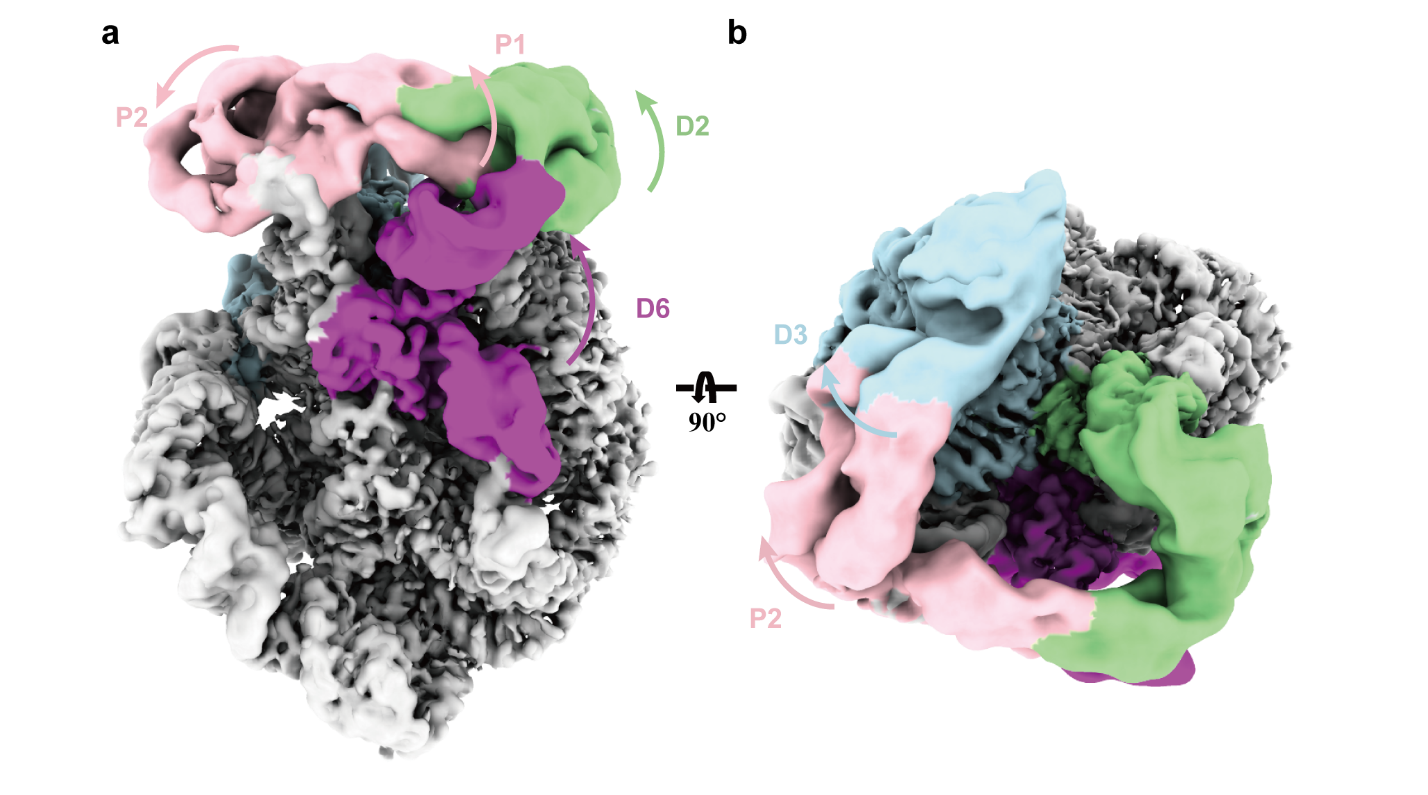
***

**Extended Data Fig. 7** | **Dynamics of *Cte* 1 intron peripheral regions during self-splicing.** The overall architecture of the *Cte* 1 intron (gray) during self-splicing remains similar, whereas the conformational change of D6 (magenta) leads to local dynamics of the peripheral regions P1 and P2 (pink), D2 (light green) and D3 (light blue) from pre-1S to post-2S, shown in **a.** front view and **b.** top view.


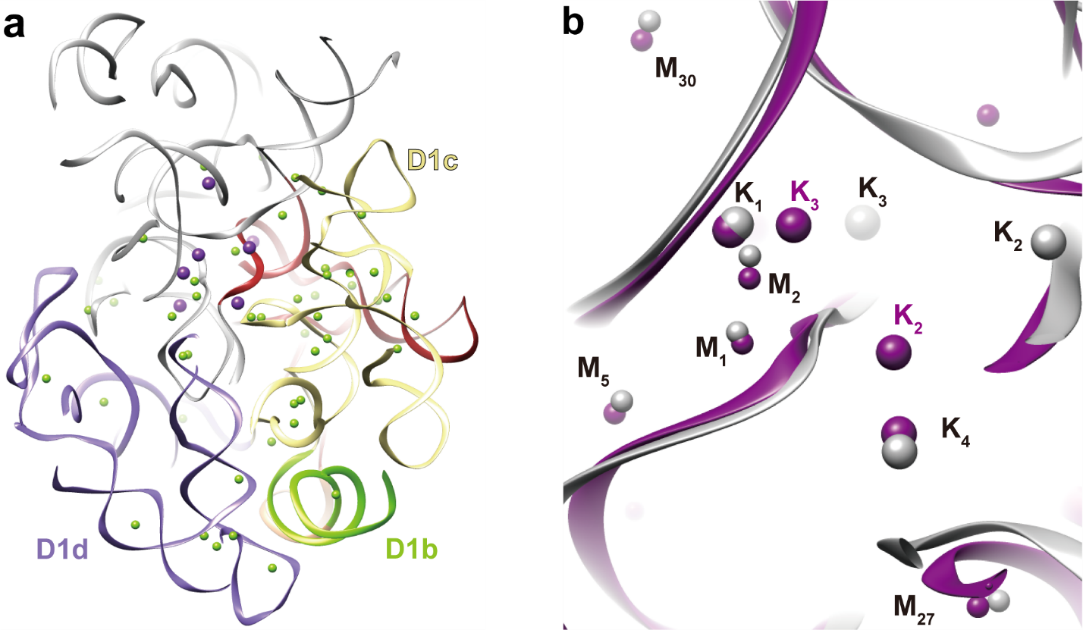


**Extended Data Fig. 8** | **Metal ion distribution in *Cte* 1 intron and comparison with *O.i.* group IIC intron (4E8Q). a.** Metal ion distribution shows that most metal ions reside in D1 domain. **b.** Comparison with *O.i*. group IIC intron reveals similar metal ion-binding sites in the catalytic core.

Extended Data Table 1 | Cryo-EM data collection, processing and model refinement statistics of different conformations in *Cte* 1 intron self-splicing

| **Data collection and processing** | Pre-1S | 1S | 2S | Post-2S |
| --- | --- | --- | --- | --- |
| Microscope | Titan Krios | | | |
| Voltage (kV) | 300 | | | |
| GIF quantum energy filter slit width (eV) | 20 | | | |
| Detector | Gatan K2 Summit | | | |
| Nominal magnification | ×165,000 | | | |
| Pixel size (Å) | 0.85 | | | |
| Symmetry imposed | C1 | | | |
| Defocus range (μm) | -0.8 to -1.5 | | | |
| Electron exposure (e-/Å 2) | 59 | 59 | 59 | 64 |
| Micrographs (acquired/used) | 14,580/14,426 | 9,449/9,402 | 5,131/5,024 | 3,591/3,542 |
| Number of extracted particles | 5,459,777 | 3,484,858 | 1,974,919 | 1,426,946 |
| Number of particles after 2D classification | 3,302,136 | 1,789,473 | 1,512,663 | 693,591 |
| Number of particles forwarded to 3D refinement | 254,834 | 100,513 | 77,976 | 59,466 |
| Map resolution at 0.143 FSC criterion (Å) | 2.65 | 2.97 | 2.90 | 2.90 |
| Local resolution range (Å) | 2.37-7.26 | 2.58-7.89 | 2.55-7.78 | 2.56-7.56 |
| Sharpening B-factor (Å2) | -65 | -62 | -67 | -54 |
| **Model refinement and validation** | | | | |
| Atoms | 15785 | 16098 | 15222 | 15711 |
| Residues | 731 | 746 | 705 | 728 |
| CCmask | 0.81 | 0.83 | 0.80 | 0.90 |
| ResolutionFSC map versus model @ 0.5(Å) | 2.9 | 3.0 | 3.0 | 3.0 |
| Bond length (Å) | 0.004 | 0.006 | 0.005 | 0.007 |
| Bond angle (°) | 0.731 | 0.999 | 0.898 | 0.991 |
| Clashscore | 2.95 | 5.29 | 3.37 | 3.18 |
| Molprobity score | 2.23 | 2.43 | 2.28 | 2.26 |

Extended Data Table 2 | Summary of tertiary interactions of *Cte* 1 compared to classic group II introns

| Group II intron | *Cte* 1 | Group IIC: 4E8K(*25*) | Group IIB: 4R0D(*32*) | Group IIA RNP: 5G2X(*33*) | Group IIB RNP: 6ME0/6MEC/8FLI(*9, 23*) | Group IIC RNP: 8T2T/8T2R/8T2S(*8*) |
| --- | --- | --- | --- | --- | --- | --- |
| Catalytic core | **√** | **√** | **√** | **√** | **√** | **√** |
| α-α' | **√** | **√** | **√** | **√** | **√** | **√** |
| β-β' | **×** | **×** | **×** | **√** | **√** | **×** |
| γ-γ' | **√** | **√** | **√** | **√** | **√** | **√** |
| δ-δ' | **×** | **×** | **√** | **√** | **√** | **√** |
| ε-ε' | **√** | **√** | **√** | **√** | **√** | **√** |
| ζ-ζ' | **√** | **√** | **√** | **√** | **√** | **√** |
| η-η' | **√** | **×** | **√** | **√** | **√** | **×** |
| θ-θ' | **√** | **√** | **√** | **√** | **√** | **√** |
| ι-ι' | **×** | **×** | **√** | **×** | **√** | **√** |
| κ-κ' | **√** | **√** | **√** | **√** | **√** | **√** |
| λ-λ' | **√** | **√** | **√** | **√** | **√** | **√** |
| μ-μ' | **√** | **×** | **√** | **√** | **√** | **√** |
| ξ-ξ' | **√** | **×** | **×** | **×** | **×** | **×** |
| ο-ο' | **√** | **×** | **×** | **×** | **×** | **×** |
| π-π' | **√** | **×** | **√** | **√** | **√** | **√** |
| ρ-ρ' | √ | **×** | **√** | **×** | **√** | **√** |
| σ-σ' | **√** | **×** | **×** | **×** | **√** | **×** |
| τ-τ' | **×** | **×** | **√** | **×** | **√** | **×** |
| υ-υ' | **√** | **×** | **√** | **×** | **×** | **×** |
| φ-φ' | **√** | **×** | **×** | **×** | **√** | **√** |
| χ-χ' | **×** | **×** | **×** | **×** | **√** | **×** |
| ψ-ψ' | **√** | **×** | **×** | **×** | **√** | **√** |
| ω-ω' | **√** | **√** | **×** | **×** | **×** | **√** |
| A-A' | **√** | **×** | **×** | **×** | **×** | **×** |
| B-B' | **√** | **×** | **×** | **×** | **×** | **×** |
| Γ-Γ' | **√** | **×** | **×** | **×** | **×** | **×** |
| Δ-Δ' | **√** | **×** | **×** | **×** | **×** | **×** |

Extended Data Table 3 | Summary of metal ions identified in *Cte* 1intron structures

| **Site** | **Type** | **Location** | **Pre-1S** | **1S** | **2S** | **Post-2S** |
| --- | --- | --- | --- | --- | --- | --- |
| **K1** | catalytic cluster | D2-D5 | **√** | **√** | **√** | **√** |
| **K2** | catalytic center | D1c-IBS1 | **√** | **√** | **√** | **√** |
| **K3** | catalytic (putative) | D2-D5 | **√** | **√** | **√** | **√** |
| **K4** | catalytic (distal) | D1c-IBS1-D5 | **√** | **√** | **√** | **√** |
| **K10** | major groove ion | D1 | **√** | **√** | **√** | **√** |
| **K19** | major groove ion | D3 | **√** | **√** | **√** | **√** |
| **K22** | major groove ion | D5 | **√** | **×** | **√** | **√** |
| **M1** | catalytic cluster | D5-IBS1 | **√** | **√** | **√** | **√** |
| **M2** | catalytic cluster | D5-IBS1 | **√** | **√** | **√** | **√** |
| **M5** | magnesium-clamp | D5 | **√** | **×** | **√** | **√** |
| **M7** | major groove ion | D1b | **√** | **×** | **×** | **×** |
| **M17** | phosphate-bound | IBS1 | **√** | **√** | **√** | **√** |
| **M24** | phosphate-bound | D2 | **√** | **√** | **√** | **×** |
| **M27** | magnesium-clamp | D1 | **√** | **√** | **√** | **√** |
| **M30** | major groove ion | D2 | **√** | **×** | **√** | **×** |
| **M35** | phosphate-bound | IBS1-D1 | **√** | **√** | **√** | **×** |
| **M36** | phosphate-bound | D1c | **√** | **√** | **√** | **√** |
| **M37** | GU wobble | D1c | **√** | **×** | **√** | **√** |
| **M38** | major groove ion | D1c | **√** | **√** | **√** | **√** |
| **M39** | GU wobble | D1a-D2 | **√** | **√** | **√** | **√** |
| **M40** | major groove ion | D1 | **√** | **√** | **√** | **√** |
| **M41** | GU wobble | D1 | **√** | **×** | **√** | **×** |
| **M42** | major groove ion | D1c | **√** | **×** | **√** | **×** |
| **M43** | major groove ion | D1d | **√** | **√** | **√** | **√** |
| **M44** | phosphate-bound | D1d | **√** | **√** | **√** | **√** |
| **M45** | major groove ion | D1d | **√** | **×** | **√** | **×** |
| **M46** | helix-bound | D1c | **√** | **×** | **√** | **√** |
| **M47** | GU wobble | D1c | **√** | **√** | **√** | **√** |
| **M48** | major groove ion | D1c | **√** | **√** | **√** | **√** |
| **M49** | major groove ion | D1c | **√** | **√** | **√** | **√** |
| **M50** | major groove ion | D1c | **√** | **√** | **×** | **√** |
| **M51** | major groove ion | D1c | **√** | **√** | **×** | **√** |
| **M52** | phosphate-bound | D1c | **√** | **×** | **×** | **×** |
| **M53** | major groove ion | D1c | **√** | **√** | **×** | **√** |
| **M54** | major groove ion | D1 | **√** | **√** | **√** | **√** |
| **M55** | major groove ion | D2 | **√** | **×** | **×** | **×** |
| **M56** | major groove ion | D1c | **√** | **√** | **√** | **√** |
| **M58** | major groove ion | D1 | **√** | **√** | **√** | **√** |
| **M59** | major groove ion | D1 | **√** | **√** | **√** | **√** |
| **M60** | phosphate-bound | D3 | **√** | **√** | **√** | **√** |
| **M61** | phosphate-bound | D5 | **×** | **×** | **√** | **×** |
| **M62** | phosphate-bound | D1d | **√** | **√** | **√** | **√** |
| **M63** | major groove ion | P2 | **√** | **√** | **√** | **√** |
| **M64** | major groove ion | D3 | **√** | **√** | **√** | **√** |
| **M65** | major groove ion | D1c | **×** | **×** | **√** | **×** |
| **M66** | major groove ion | D5 | **√** | **√** | **√** | **√** |
| **M67** | phosphate-bound | D1 | **√** | **√** | **√** | **√** |
| **M68** | phosphate-bound | D3 | **√** | **√** | **√** | **√** |
| **M69** | phosphate-bound | D1d | **×** | **√** | **√** | **√** |
| **M70** | phosphate-bound | D1 | **√** | **√** | **√** | **√** |
| **M71** | phosphate-bound | D1 | **√** | **√** | **√** | **√** |
| **M72** | major groove ion | D1b | **√** | **√** | **√** | **√** |
| **M73** | major groove ion | D1d | **√** | **×** | **√** | **×** |
| **M74** | major groove ion | D1 | **√** | **√** | **√** | **√** |
| **M75** | major groove ion | D1 | **√** | **√** | **√** | **√** |
| **M76** | phosphate-bound | D1 | **√** | **×** | **×** | **×** |
| **M77** | phosphate-bound | D2 | **√** | **×** | **×** | **×** |
| **M78** | major groove ion | D1d | **√** | **×** | **×** | **×** |
| **M79** | major groove ion | D1c | **√** | **√** | **√** | **√** |
| **M80** | major groove ion | D1a-D2 | **×** | **√** | **×** | **×** |
| **M81** | major groove ion | D2 | **×** | **√** | **×** | **√** |
| **M82** | magnesium-clamp | D1 | **×** | **√** | **×** | **√** |
| **M83** | phosphate-bound | D1c | **×** | **√** | **×** | **√** |
| **M84** | major groove ion | D1 | **×** | **√** | **×** | **√** |
| **M85** | phosphate-bound | D5-D6 | **×** | **×** | **×** | **√** |
| **M86** | phosphate-bound | D1d | **√** | **√** | **√** | **√** |

Extended Data Table 4 | Primers and RNA sequences used in this study

| Description | RNA Sequences (5' – 3') |
| --- | --- |
| *Comamonas testosteroni, Cte* 1 | CCGGGGCGCCACCCCGGAAGUGAUGCGAGUCGCCAACUCGCAUCACAAGCAAACGCUGUAGCCGCGUGCCUCUAAUAGGGCUGGCGCGGUUGCGAAGGGCGCUGGUGAGUGCAACUCUCACCUUCGACCCAAUCCAUCUUGCGGCUCAACCCCGCAAGAUCAUCGCCAGACCGCUGGCGGCGUACUGAGUGACAAACGAGGCAAAACCAAAUUGAAGUUGGGCGACCGUGAAACGGCGCUGGGCAGGAAAUGGCCCAGUGACCUGGUCAAUGGUGAAAGUCGGUGAAAGACCGACCGGUGGGGCGUAUCGAAAGAGCGCAACACCUGCCGCACAGGAUGGCUUCUGAGGUACCGGUGACGGUACAGAACGCGGAGGGGAAACCUGGAAGCGAGGGCACCUCGGGAAACCGGGGGUCGAUGCAUAGCUCAAACCUGUAACGGCACCAGUGGAGGGUGCUGUGCGGAGCAACGUGGAGCCACAGGCAUGAAGCCGUGGUUCGUAGUCGAUGAGACAAGCGGUGAGUAAGGGAAGGGCUGCGAACAUCGCCUCCCCGAAAUCCAAGGAAAGCCGAAAGGCUAGCCGCUUUGUUGAGACAGUGGCGCCACGUUGCGCAUUAGCCGUGACCUAAACGGGGAACCUCUUGGCCGUACCGACUCGGGUGGCACCGGUCGGGCUCGAUGGCUCAAGAGGGGGAGAUGUGAUGAUUAGGGUUUGACCCGUGAUGCGAUACGACCGAAGCAUCCGGGGAGCUGUCUGACGAAGAGUCGGCAGCAGUGGGUUUGGCGACCCGCUCCGAAAGUCGCAAGCGUUUGC |
| *Cte* 1 forward primer for IVT DNA template preparation | AACTGAGATACCTACAGCGTGA |
| *Cte* 1 reverse primer for IVT DNA template preparation | (MeG)(MeC)AAACGCTTGCGACTTTCGGA |
| Mutant sequences of *Cte* 1 mut A' | nts 404-407: GAAA to **UUCG** |
| Forward primer for *Cte* 1 mut A' plasmid construction | GCGAGGGCACCTCGG**TTCG**CCGGGGGTCGATGCATAGC |
| Reverse primer for  *Cte* 1 mut A' plasmid construction | GACCCCCGG**CGAA**CCGAGGTGCCCTCGCTTCCAGG |
| Mutant sequences of *Cte* 1 mut B | nts 310-313: GAAA to **UUCG** |
| Forward primer for  *Cte* 1 mut B plasmid construction | CGACCGGTGGGGCGTATC**TTCG**GAGCGCAACACCTGCCGC |
| Reverse primer for  *Cte* 1 mut B plasmid construction | GTGTTGCGCTC**CGAA**GATACGCCCCACCGGTCGGTCTTTC |
| Mutant sequences of *Cte* 1 mut ξ | nts 247-250: GAAA to **UUCG** |
| Forward primer for  *Cte* 1 mut ξ plasmid construction | CGCTGGGCAG**TTCG**TGGCCCAGTGACCTGGTCAA |
| Reverse primer for  *Cte* 1 mut ξ plasmid construction | CTGGGCCA**CGAA**CTGCCCAGCGCCGTTTCACGG |
| Mutant sequences of *Cte* 1 mut ο' | nts 730-735: ACGACC to **UGCUGG** |
| Forward primer for  *Cte* 1 mut ο' plasmid construction | TGATGCGATTGCTTGGAAGCATCCGGGGAGCTGTCTGACG |
| Reverse primer for  *Cte* 1 mut ο' plasmid construction | CCCCGGATGCTTCCAAGCAATCGCATCACGGGTCAAACC |
| Mutant sequences of *Cte* 1 mut Δ' | nts 31-35: CGCCA to **GCGGU** |
| Forward primer for  *Cte* 1 mut Δ' plasmid construction | TCACTATAGGCCGGGG**GCGGT**CCCCGGAAGTGATGCGAGTCGCCAAC |
| Reverse primer for  *Cte* 1 mut Δ' plasmid construction | ATCACTTCCGGGG**ACCGC**CCCCGGCCTATAGTGAGTCGTATTA |
| Mutant sequences of *Cte* 1 mut Γ' | nts 7-11: CGCCA to **GCGGU** |
| Forward primer for  *Cte* 1 mut Γ' plasmid construction | AGTGATGCGAGT**GCGGT**ACTCGCATCACAAGCAAACGCTGTAGCC |
| Reverse primer for  *Cte* 1 mut Γ' plasmid construction | GTGATGCGAGT**ACCGC**ACTCGCATCACTTCCGGGGTGGCGCCCCGG |
| Mutant sequences of *Cte* 1 mut υ' | nt 347: A to **C** |
| Forward primer for  *Cte* 1 mut υ' plasmid construction | GCTTCTG**C**GGTACCGGTGACGGTAC |
| Reverse primer for  *Cte* 1 mut υ' plasmid construction | GGTACC**G**CAGAAGCCATCCTGTGCGG |
